# Supplementary material
Source: PubMed Central journal article supplement (PMC3773910)
Supplement: NIHMS54329-supplement-Supplementary_Text_and_Figures.pdf [file NIHMS54329-supplement-Supplementary_Text_and_Figures.pdf]

# **Common Variants on 8p12 and 1q24.2 Confer Risk of Schizophrenia**

Yongyong Shi<sup>1,2,#,\*</sup>, Zhiqiang Li<sup>1,#</sup>, Qi Xu<sup>3,#</sup>, Ti Wang<sup>1</sup>, Tao Li<sup>1</sup>, Jiawei Shen<sup>1</sup>, Fengyu Zhang<sup>4</sup>, Jianhua Chen<sup>5</sup>, Guoquan Zhou<sup>2</sup>, Weidong Ji<sup>2</sup>, Baojie Li<sup>1</sup>, Yifeng Xu<sup>5</sup>, Dengtang Liu<sup>5</sup>, Peng Wang<sup>6</sup>, Ping Yang<sup>6</sup>, Benxiu Liu<sup>7</sup>, Wensheng Sun<sup>7</sup>, Chunling Wan<sup>1</sup>, Shengying Qin<sup>1</sup>, Guang He<sup>1</sup>, Stacy Steinberg<sup>8</sup>, Sven Cichon<sup>9,10</sup>, Thomas Werge<sup>11</sup>, Engilbert Sigurdsson<sup>12</sup>, Sarah Tosato<sup>13</sup>, Aarno Palotie<sup>14,15,16,17</sup>, Markus M. Nöthen<sup>9</sup>, Marcella Rietschel<sup>18,19</sup>, Roel A. Ophoff<sup>20,21</sup>, David A. Collier<sup>22</sup>, Dan Rujescu<sup>23</sup>, David St Clair<sup>24</sup>, Hreinn Stefansson<sup>8</sup>, Kari Stefansson<sup>8</sup>, Jue Ji<sup>1</sup>, Qingzhong Wang<sup>1</sup>, Wenjin Li<sup>1</sup>, Linqing Zheng<sup>1</sup>, Hairong Zhang<sup>1</sup>, Guoyin Feng<sup>5</sup>, Lin He<sup>1,25,26,\*</sup>

## **Supplementary Information**

**Supplementary Figure 1.** Quantile-quantile Plots of BIOX GWAS datasets combined result.

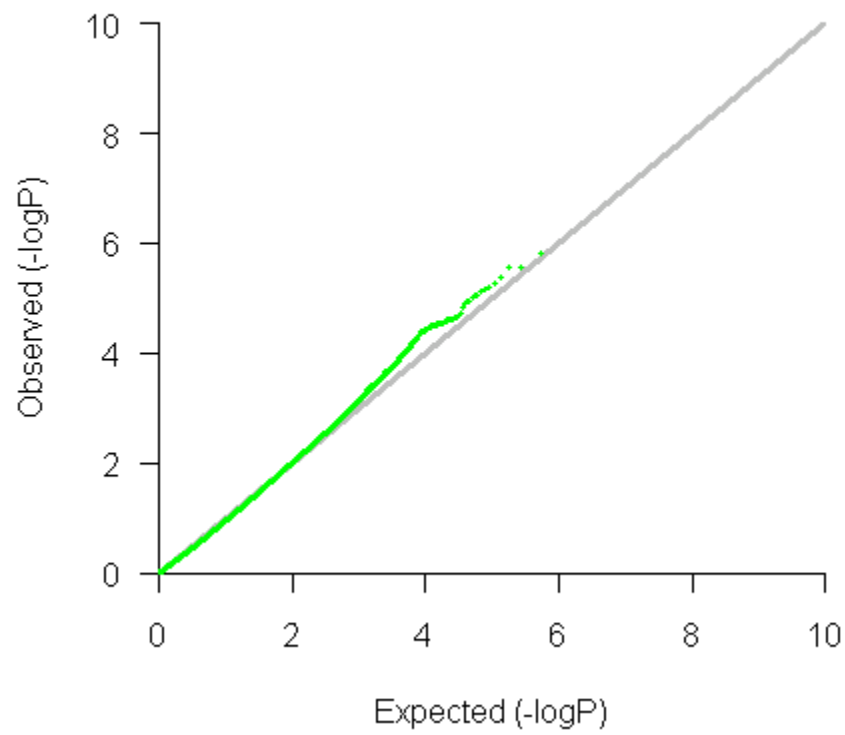

**Supplementary Figure 2.** Manhattan plot of the BIOX GWAS.

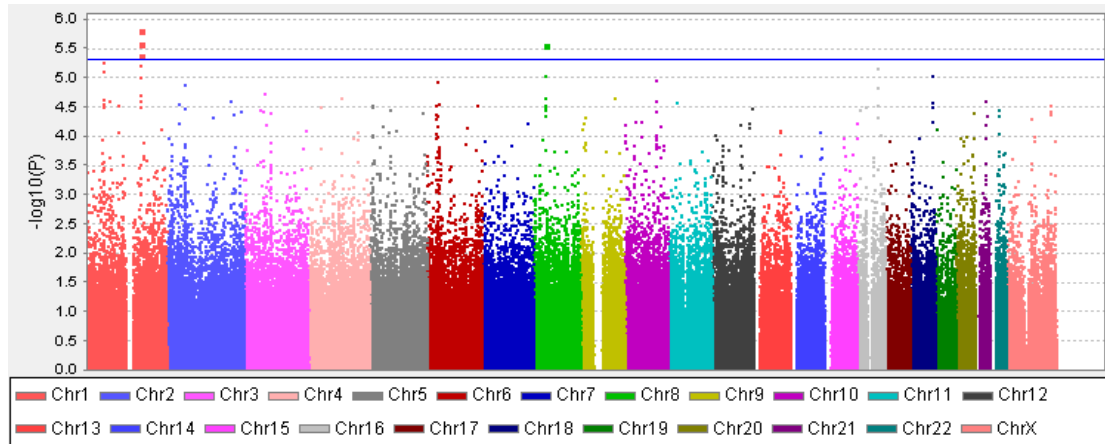

Note: Manhattan plot of the meta-analysis result in the discovery stage

**Supplementary Figure 3.** The principal components analysis (PCA) of the Chinese Northern, Central, and Southern samples and HapMap individuals (CEU, CHB, JPT and YRI).

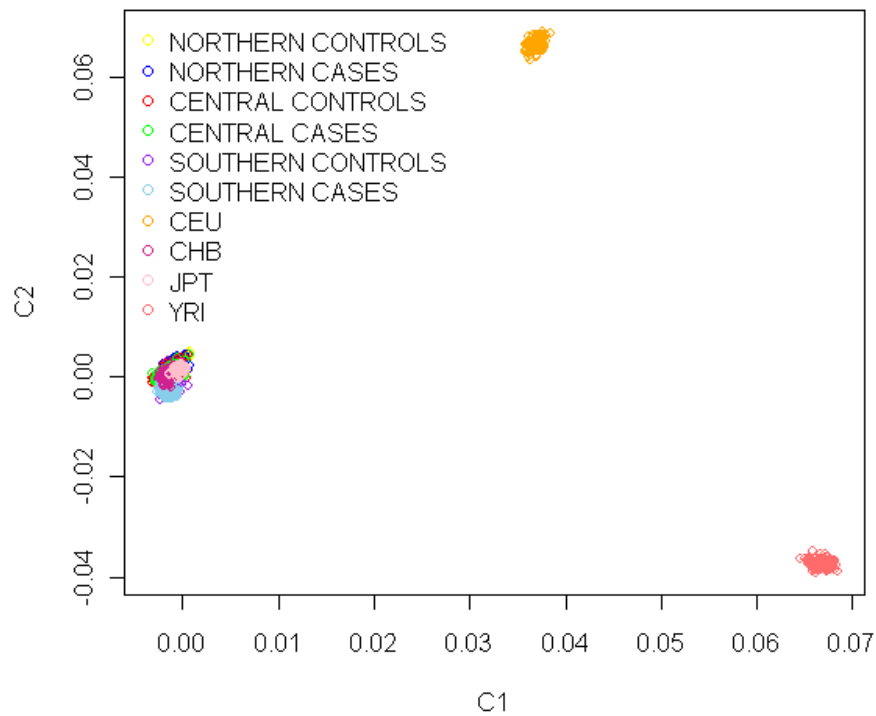

Note: Samples from different geographical origin were marked by different colors

**Supplementary Figure 4.** The principal components analysis (PCA) of the Chinese Northern, Central, and Southern samples (a, combined and b, c, & d separate plots).

**a. Combined results**

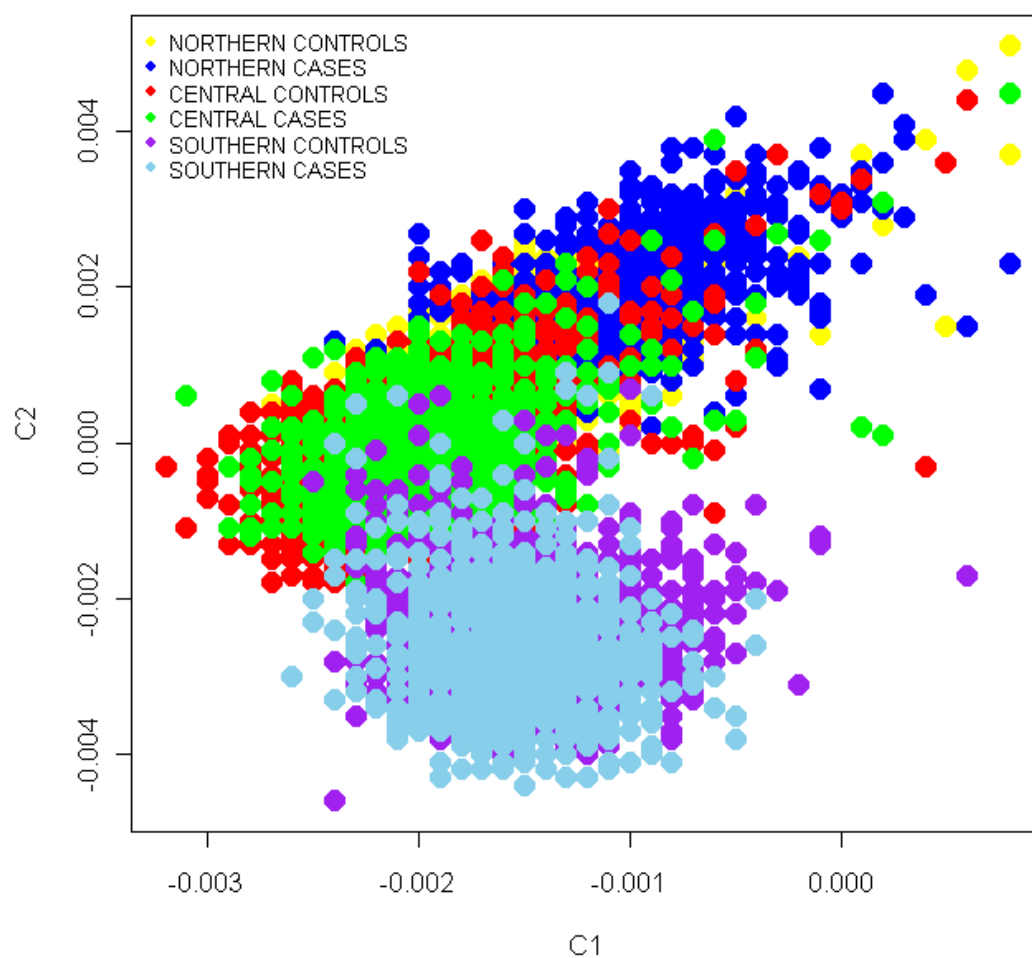

**b. Results of the Northern Han samples**

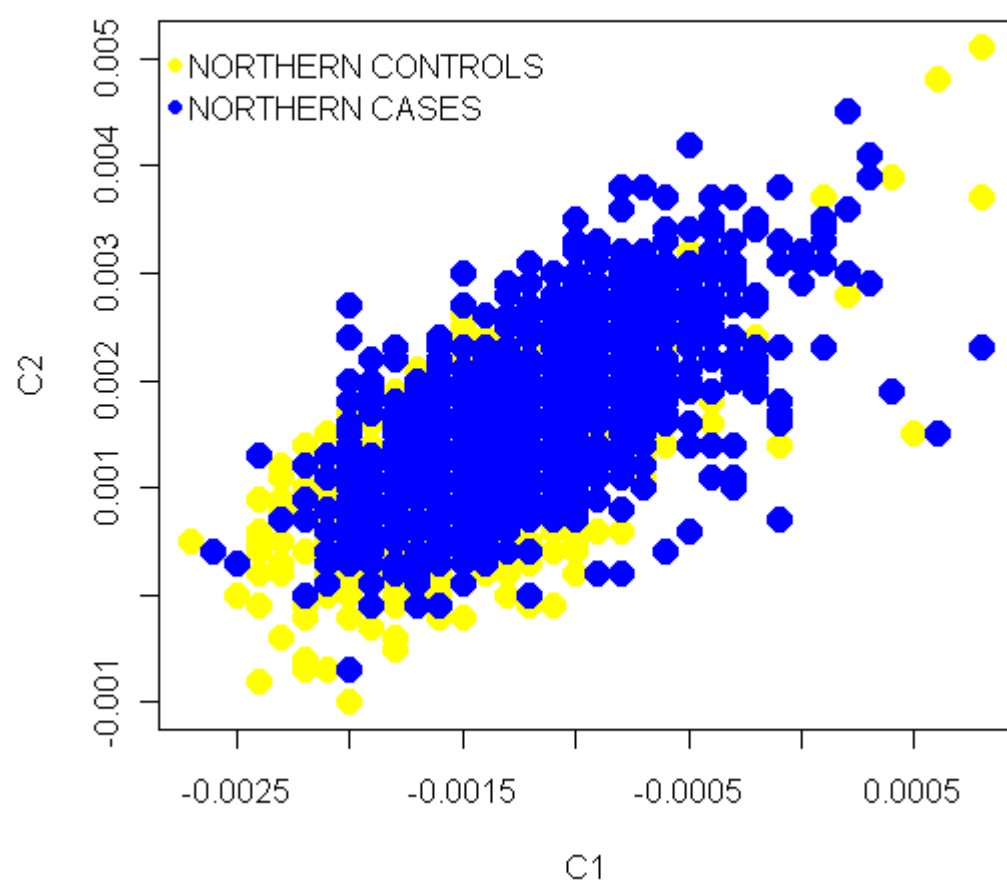

c. Results of the Central Han samples

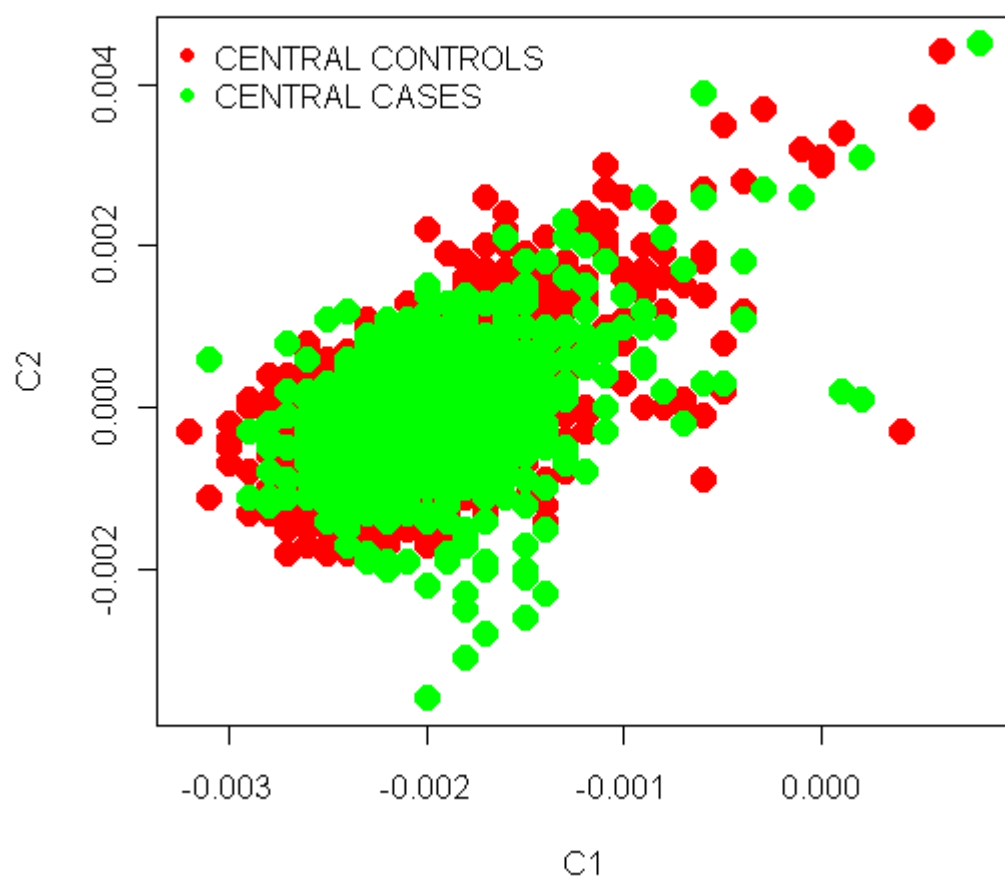

**d.** Results of the Southern Han samples

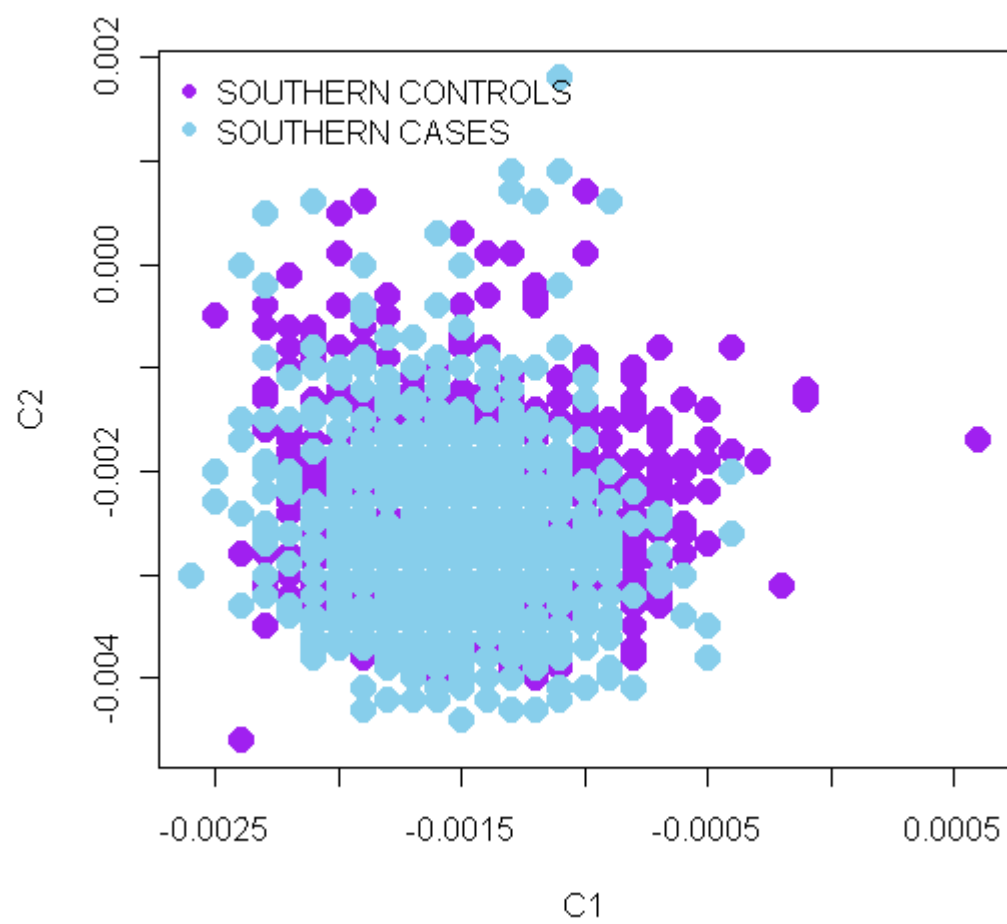

**Supplementary Table 1. Descriptive statistics of our samples.**

|                                                         | Bio-X GWAS   |           |                           |           |              |           | REPLICATION    |           |
|---------------------------------------------------------|--------------|-----------|---------------------------|-----------|--------------|-----------|----------------|-----------|
|                                                         | NORTHERN HAN |           | CENTRAL HAN               |           | SOUTHERN HAN |           | cases          | controls  |
|                                                         | cases        | controls  | cases                     | controls  | cases        | controls  |                |           |
| <b>n</b>                                                | 1578         | 1592      | 1238                      | 2856      | 934          | 2020      | 4383           | 4539      |
| <b>% Female</b>                                         | 30.2         | 49.7      | 44.1                      | 64.5      | 41.6         | 52.3      | 43.4           | 65.3      |
| <b>Age (years)</b>                                      | 36.9±9.3     | 30.8±11.1 | 36.2±12.4                 | 60.9±12.2 | 36.3±16.6    | 56.1±13.5 | 35.6±13.3      | 60.7±11.2 |
| <b>Clinics<br/>(# of inpatient<br/>facilities/beds)</b> | PUSH (200)   | -         | SIMH (1878)<br>FPHW (210) | -         | LMHG (600)   | -         | SIMH<br>(1878) | -         |

PUSH, Peking University Sixth Hospital; SIMH, Shanghai Institute of Mental Health; FPHW, Fourth People's Hospital, Wuhu; LMHG, Longquan Mountain Hospital of Guangxi Province.

**Supplementary Table 2. Meta-analysis for the selected SNPs.**

| CHR | BP        | SNP        | A1 | GROUP               | P        | P(R)     | OR   | OR(R) | Q    | I <sup>2</sup> |
|-----|-----------|------------|----|---------------------|----------|----------|------|-------|------|----------------|
| 1   | 166169703 | rs10489202 | A  | BIOX GWAS           | 2.65E-06 | 2.65E-06 | 1.27 | 1.27  | 0.74 | 0.00           |
|     |           |            |    | BIOX GWAS+FOLLOW-UP | 9.50E-09 | 9.50E-09 | 1.23 | 1.23  | 0.71 | 0.00           |
|     |           |            |    | BIOX+SGENE-plus     | 1.61E-05 | 5.46E-03 | 1.12 | 1.17  | 0.00 | 74.63          |
| 1   | 166240600 | rs1060041  | T  | BIOX GWAS           | 4.11E-06 | 4.11E-06 | 1.26 | 1.26  | 0.52 | 0.00           |
|     |           |            |    | BIOX GWAS+FOLLOW-UP | 5.31E-07 | 1.79E-04 | 1.17 | 1.19  | 0.16 | 42.53          |
|     |           |            |    | BIOX+SGENE-plus     | -        | -        | -    | -     | -    | -              |
| 1   | 166357655 | rs11586522 | T  | BIOX GWAS           | 1.53E-06 | 1.53E-06 | 1.25 | 1.25  | 0.82 | 0.00           |
|     |           |            |    | BIOX GWAS+FOLLOW-UP | 1.17E-04 | 9.78E-03 | 1.13 | 1.17  | 0.02 | 68.58          |
|     |           |            |    | BIOX+SGENE-plus     | -        | -        | -    | -     | -    | -              |

|   |          |            |   |                     |          |          |      |      |      |       |
|---|----------|------------|---|---------------------|----------|----------|------|------|------|-------|
| 8 | 38150502 | rs16887244 | G | BIOX GWAS           | 9.27E-06 | 9.27E-06 | 0.84 | 0.84 | 0.71 | 0.00  |
|   |          |            |   | BIOX GWAS+FOLLOW-UP | 1.27E-10 | 1.27E-10 | 0.84 | 0.84 | 0.87 | 0.00  |
|   |          |            |   | BIOX+SGENE-plus     | 8.14E-11 | 8.14E-11 | 0.86 | 0.86 | 0.41 | 0.00  |
| 8 | 38252950 | rs1488935  | T | BIOX GWAS           | 2.81E-06 | 2.81E-06 | 0.83 | 0.83 | 0.65 | 0.00  |
|   |          |            |   | BIOX GWAS+FOLLOW-UP | 5.06E-09 | 5.06E-09 | 0.85 | 0.85 | 0.64 | 0.00  |
|   |          |            |   | BIOX+SGENE-plus     | 1.09E-09 | 1.20E-08 | 0.88 | 0.87 | 0.34 | 11.19 |

Note: 3,750 cases and 6,468 controls were used in BIOX GWAS, including the Northern Han sample set of 1,578 cases and 1,592 controls; the Central Han sample set of 1,238 cases and 2,856 controls; and the Southern Han sample set of 934 cases and 2,020 controls. 4,383 cases, and 4,539 controls were used in FOLLOW-UP. And the SGENE-plus project includes 3,830 cases and 14,724 controls of European ancestry. P, Fixed-effects meta-analysis p-value; P(R), Random-effects meta-analysis p-value; OR, Fixed-effects OR estimate; OR(R), Random-effects OR estimate; Q, p-value for Cochran's Q statistic;  $I^2$ , I2 heterogeneity index (0-100).

**Supplementary Table 3. Comparison of BIOX top findings between two datasets.**

| SNP        | Allele <sup>a</sup> | European Population |                                                        |      |          |           | Asian Population    |                                                  |      |          |           |
|------------|---------------------|---------------------|--------------------------------------------------------|------|----------|-----------|---------------------|--------------------------------------------------|------|----------|-----------|
|            |                     | MAF<br>(HapMap-CEU) | SGENE-plus dataset<br>(3,830 cases vs 14,724 controls) |      |          |           | MAF<br>(HapMap-HCB) | BIOX dataset<br>(8,133 cases vs 11,061 controls) |      |          |           |
|            |                     |                     | MAF <sup>b</sup>                                       | OR   | P        | 95% CI    |                     | MAF <sup>c</sup>                                 | OR   | P        | 95% CI    |
| rs10489202 | A                   | 0.243               | 0.221                                                  | 1.01 | 8.31E-01 | 0.94~1.09 | 0.163               | 0.141                                            | 1.23 | 9.50E-09 | 1.15~1.32 |
| rs16887244 | G                   | 0.288               | 0.227                                                  | 0.92 | 2.63E-02 | 0.85~0.99 | 0.349               | 0.317                                            | 0.84 | 1.27E-10 | 0.79~0.88 |
| rs1488935  | T                   | 0.265               | 0.216                                                  | 0.92 | 2.66E-02 | 0.85~0.99 | 0.349               | 0.316                                            | 0.85 | 5.06E-09 | 0.81~0.90 |

<sup>a</sup>Mnor allele; <sup>b</sup>Frequency is the average minor allelic frequency of controls in SGENE-plus dataset; <sup>c</sup>Frequency is the average minor allelic frequency of controls in BIOX dataset.

**Supplementary Table 4. Statistical Power analysis for BIOX and SGENE-plus datasets.**

| Risk Allele Frequency→ |      | 0.05                                                                  | 0.15        | 0.30        | 0.45        | 0.60        | 0.75        | 0.90 |
|------------------------|------|-----------------------------------------------------------------------|-------------|-------------|-------------|-------------|-------------|------|
| RR↓                    |      | BIOX DATASET (8,133 cases and 11,061 controls, 19,194 in total)       |             |             |             |             |             |      |
|                        | 1.05 | 0.00                                                                  | 0.00        | 0.00        | 0.00        | 0.00        | 0.00        | 0.00 |
|                        | 1.10 | 0.00                                                                  | <b>0.02</b> | <b>0.13</b> | <b>0.21</b> | <b>0.18</b> | <b>0.07</b> | 0.00 |
|                        | 1.15 | <b>0.01</b>                                                           | <b>0.33</b> | <b>0.82</b> | <b>0.91</b> | <b>0.88</b> | <b>0.63</b> | 0.07 |
|                        | 1.20 | <b>0.08</b>                                                           | <b>0.87</b> | <b>1.00</b> | <b>1.00</b> | <b>1.00</b> | <b>0.98</b> | 0.37 |
|                        | 1.25 | <b>0.34</b>                                                           | <b>1.00</b> | 1.00        | 1.00        | 1.00        | <b>1.00</b> | 0.77 |
| RR↓                    |      | SGENE-plus DATASET (3,830 cases and 14,724 controls, 18,554 in total) |             |             |             |             |             |      |
|                        | 1.05 | 0.00                                                                  | 0.00        | 0.00        | 0.00        | 0.00        | 0.00        | 0.00 |
|                        | 1.10 | 0.00                                                                  | 0.00        | 0.03        | 0.05        | 0.04        | 0.01        | 0.00 |
|                        | 1.15 | 0.00                                                                  | 0.09        | 0.40        | 0.54        | 0.47        | 0.22        | 0.01 |
|                        | 1.20 | 0.02                                                                  | 0.50        | 0.92        | 0.96        | 0.94        | 0.72        | 0.09 |
|                        | 1.25 | 0.10                                                                  | 0.90        | 1.00        | 1.00        | 1.00        | 0.97        | 0.31 |

The power was computed based on the sample size of the BIOX and SGENE-plus datasets at significance level  $\alpha = 5E-8$ . A larger statistical power compared with another dataset is demonstrated in Bold and Italic mode.

**Supplementary Table 5. Regression analysis to test for independent association.**

| CHR      | Test SNP          | BP               | Test SNP P <sup>a</sup> | Conditioned on | NORTHERN HAN    |                   | CENTRAL HAN     |                   | SOUTHERN HAN    |                   |
|----------|-------------------|------------------|-------------------------|----------------|-----------------|-------------------|-----------------|-------------------|-----------------|-------------------|
|          |                   |                  |                         |                | Test SNP P      | Conditioned SNP P | Test SNP P      | Conditioned SNP P | Test SNP P      | Conditioned SNP P |
| 1        | rs2071922         | 166092230        | 4.32E-02                | rs10489202     | 6.35E-02        | 4.04E-01          | 2.62E-01        | 9.16E-01          | 6.79E-01        | 9.41E-01          |
| 1        | rs6427113         | 166112411        | 3.09E-05                |                | 3.04E-03        | 3.12E-01          | 4.82E-03        | 9.71E-01          | 2.24E-01        | 7.64E-01          |
| 1        | rs203782          | 166149010        | 9.26E-04                |                | 2.78E-02        | 5.93E-01          | 1.43E-02        | 4.52E-01          | 3.75E-01        | 6.06E-01          |
| <b>1</b> | <b>rs10489202</b> | <b>166169703</b> | <b>2.65E-06</b>         |                | <b>3.28E-03</b> | <b>NA</b>         | <b>6.19E-04</b> | <b>NA</b>         | <b>1.28E-01</b> | <b>NA</b>         |
| 1        | rs1060041         | 166240600        | 4.11E-06                |                | 3.30E-03        | NA                | 4.06E-04        | NA                | 2.45E-01        | NA                |
| 1        | rs413168          | 166272413        | 1.43E-03                |                | 3.79E-02        | 4.55E-01          | 9.98E-03        | 6.35E-01          | 5.36E-01        | 3.72E-01          |
| 1        | rs17485889        | 166285464        | 2.53E-05                |                | 1.10E-02        | 2.95E-01          | 7.70E-04        | 8.72E-01          | 2.67E-01        | 5.70E-01          |
| 1        | rs275137          | 166317890        | 6.50E-04                |                | 1.99E-02        | 8.22E-01          | 2.80E-02        | 6.48E-01          | 2.05E-01        | 8.27E-01          |
| 1        | rs16828104        | 166357523        | 9.90E-03                |                | 4.41E-01        | 8.20E-01          | 7.09E-03        | 3.32E-02          | 4.13E-01        | 6.31E-01          |
| 1        | rs11586522        | 166357655        | 1.53E-06                |                | 1.37E-03        | 1.33E-01          | 9.77E-04        | 3.59E-01          | 1.23E-01        | 6.64E-01          |
| 1        | rs11805261        | 166361885        | 3.52E-02                |                | 3.68E-01        | 7.05E-01          | 3.42E-02        | 9.53E-02          | 6.42E-01        | 7.83E-01          |
| 8        | rs2275957         | 38115484         | 2.10E-02                | rs16887244     | 6.41E-01        | 9.84E-01          | 7.53E-03        | 6.56E-02          | 3.42E-01        | 5.23E-01          |
| 8        | rs2843738         | 38148865         | 7.14E-03                |                | 9.42E-02        | 6.25E-01          | 3.60E-02        | 7.58E-01          | 4.61E-01        | 9.50E-01          |
| <b>8</b> | <b>rs16887244</b> | <b>38150502</b>  | <b>9.27E-06</b>         |                | <b>1.72E-02</b> | <b>NA</b>         | <b>5.16E-04</b> | <b>NA</b>         | <b>1.01E-01</b> | <b>NA</b>         |
| 8        | rs2898674         | 38229372         | 2.99E-05                |                | 1.80E-02        | 6.27E-01          | 1.13E-03        | 4.13E-01          | 1.54E-01        | 3.74E-01          |
| 8        | rs1488935         | 38252950         | 2.81E-06                |                | 1.13E-02        | 5.43E-01          | 2.30E-04        | 7.93E-01          | 8.87E-02        | 9.64E-01          |
| 8        | rs11985168        | 38279200         | 6.86E-05                |                | 2.72E-02        | 6.70E-01          | 2.14E-03        | 1.99E-01          | 1.52E-01        | 8.51E-01          |

Associated SNPs on chromosome 1q24.2 and 8p12 were tested for their independent effect using logistic regression analysis. Results shown here are from the each dataset (the Northern Han sample set of 1,578 cases and 1,592 controls; the Central Han sample set of 1,238 cases and 2,856 controls; and the Southern Han sample set of 934 cases and 2,020 controls). The allelic dosage of conditioned SNPs was entered as a covariate in the regression model. <sup>a</sup>These P values were combined results of the PCA-adjusted genome-wide associations of three cohorts.

**Supplementary Table 6. Expression quantitative trait loci (eQTL) analysis of rs10489202 and rs16887244 for lymphoblastic cell lines of HAPMAP samples.**

| SNP        | Gene     | Probe         | HAPMAP    |        |                 | CHB+JPT   |        |                 | CEU       |        |                 | YRI       |        |          |
|------------|----------|---------------|-----------|--------|-----------------|-----------|--------|-----------------|-----------|--------|-----------------|-----------|--------|----------|
|            |          |               | BETA      | STAT   | P               | BETA      | STAT   | P               | BETA      | STAT   | P               | BETA      | STAT   | P        |
| rs10489202 | MPZL1    | GI_21359956-S | -5.04E-02 | -1.505 | 1.34E-01        | 4.30E-02  | 0.905  | 3.68E-01        | -1.52E-01 | -2.936 | <b>4.79E-03</b> | 3.29E-02  | 0.202  | 8.41E-01 |
|            | ADCY10   | GI_21614540-S | 8.54E-03  | 0.894  | 3.72E-01        | 1.14E-02  | 0.978  | 3.31E-01        | 1.50E-03  | 0.110  | 9.13E-01        | -9.71E-03 | -0.210 | 8.34E-01 |
|            | BRP44    | GI_7661601-S  | -2.06E-02 | -0.540 | 5.90E-01        | 5.23E-02  | 1.018  | 3.12E-01        | -9.64E-02 | -1.370 | 1.76E-01        | -1.24E-01 | -0.706 | 4.83E-01 |
|            | DCAF6    | GI_8923955-S  | 1.17E-01  | 3.706  | <b>2.71E-04</b> | 1.24E-01  | 2.615  | <b>1.05E-02</b> | 2.64E-02  | 0.488  | 6.27E-01        | 1.04E-01  | 0.947  | 3.48E-01 |
|            | GPR161   | GI_24476015-I | -1.18E-02 | -1.320 | 1.88E-01        | -2.77E-02 | -1.947 | 5.47E-02        | -1.16E-03 | -0.087 | 9.31E-01        | -2.21E-02 | -0.474 | 6.37E-01 |
|            | TIPRL    | GI_33239373-S | 5.59E-02  | 0.905  | 3.67E-01        | -1.91E-01 | -3.036 | <b>3.16E-03</b> | -4.11E-02 | -0.501 | 6.19E-01        | -2.05E-01 | -0.653 | 5.16E-01 |
| rs16887244 | ASH2L    | GI_4757789-S  | 6.15E-02  | 2.215  | <b>2.79E-02</b> | 7.13E-02  | 1.842  | 6.88E-02        | 6.51E-02  | 1.153  | 2.54E-01        | -4.68E-02 | -0.868 | 3.89E-01 |
|            | STAR     | GI_4507250-S  | 3.14E-02  | 1.182  | 2.39E-01        | 1.17E-02  | 0.327  | 7.44E-01        | 2.10E-02  | 0.403  | 6.89E-01        | 1.51E-02  | 0.350  | 7.27E-01 |
|            | LSM1     | GI_7657312-S  | -4.07E-02 | -1.436 | 1.52E-01        | -9.49E-02 | -2.240 | <b>2.76E-02</b> | -4.96E-03 | -0.101 | 9.20E-01        | -6.19E-02 | -0.922 | 3.61E-01 |
|            | BAG4     | GI_14574569-S | 5.67E-02  | 2.895  | <b>4.20E-03</b> | -1.18E-02 | -0.414 | 6.80E-01        | 6.60E-02  | 1.986  | 5.18E-02        | 7.63E-02  | 1.576  | 1.20E-01 |
|            | DDHD2    | GI_37556116-S | 8.74E-02  | 3.695  | <b>2.82E-04</b> | 4.90E-02  | 1.479  | 1.43E-01        | 9.89E-02  | 1.924  | 5.93E-02        | 3.66E-02  | 0.800  | 4.27E-01 |
|            | PPAPDC1B | GI_40316920-S | 8.94E-02  | 3.050  | <b>2.59E-03</b> | 4.43E-02  | 1.135  | 2.60E-01        | 1.30E-01  | 2.246  | <b>2.85E-02</b> | 1.24E-01  | 1.434  | 1.57E-01 |
|            | WHSC1L1  | GI_13699810-I | -1.13E-02 | -0.821 | 4.13E-01        | -3.30E-02 | -1.599 | 1.14E-01        | 7.34E-03  | 0.333  | 7.40E-01        | 1.88E-02  | 0.503  | 6.17E-01 |
|            | LETM2    | GI_21389522-S | 4.31E-03  | 0.435  | 6.64E-01        | 1.37E-03  | 0.115  | 9.09E-01        | 2.19E-02  | 1.642  | 1.06E-01        | 5.51E-02  | 1.847  | 6.98E-02 |
|            | FGFR1    | GI_13186246-A | -1.03E-02 | -0.779 | 4.37E-01        | -2.44E-03 | -0.173 | 8.63E-01        | 2.24E-02  | 0.724  | 4.72E-01        | -2.82E-02 | -0.932 | 3.55E-01 |

BETA, Regression coefficient; STAT, Coefficient t-statistic; P, Asymptotic p-value for t-statistic.

**Supplementary Table 7. Expression quantitative trait loci (eQTL) analysis of rs10489202 and rs16887244 for brain.**

| SNP        | Gene     | Probe        | Temporal Cortex |        |                 | PONS      |        |                 | Frontal Cortex |        |                 | Cerebellum |        |                 |
|------------|----------|--------------|-----------------|--------|-----------------|-----------|--------|-----------------|----------------|--------|-----------------|------------|--------|-----------------|
|            |          |              | BETA            | STAT   | P               | BETA      | STAT   | P               | BETA           | STAT   | P               | BETA       | STAT   | P               |
| rs10489202 | MPZL1    | ILMN_1739103 | -5.09E-03       | -0.828 | 4.09E-01        | 5.17E-03  | 0.825  | 4.11E-01        | 8.06E-04       | 0.124  | 9.02E-01        | 6.47E-03   | 0.817  | 4.15E-01        |
|            | ADCY10   | ILMN_1808797 | -8.73E-03       | -0.645 | 5.20E-01        | -5.22E-03 | -0.290 | 7.73E-01        | 1.48E-04       | 0.010  | 9.92E-01        | -1.62E-03  | -0.086 | 9.31E-01        |
|            | BRP44    | ILMN_1727813 | -2.62E-02       | -1.638 | 1.04E-01        | -2.34E-02 | -1.785 | 7.64E-02        | -3.85E-03      | -0.219 | 8.27E-01        | -1.29E-02  | -0.749 | 4.55E-01        |
|            | DCAF6    | ILMN_1670000 | -7.41E-04       | -0.028 | 9.78E-01        | 1.03E-02  | 0.328  | 7.44E-01        | 1.77E-02       | 0.673  | 5.02E-01        | -1.88E-03  | -0.095 | 9.24E-01        |
|            | GPR161   | ILMN_1658586 | 6.17E-03        | 1.146  | 2.54E-01        | 1.13E-02  | 1.729  | 8.59E-02        | 7.66E-03       | 1.075  | 2.84E-01        | -2.47E-03  | -0.276 | 7.83E-01        |
|            | TIPRL    | ILMN_1781457 | -1.68E-02       | -0.834 | 4.06E-01        | -1.64E-02 | -0.876 | 3.83E-01        | -3.05E-02      | -1.366 | 1.74E-01        | -9.88E-03  | -0.420 | 6.75E-01        |
| rs16887244 | ASH2L    | ILMN_1666933 | 3.54E-02        | 2.453  | <b>1.54E-02</b> | 2.08E-02  | 1.473  | 1.43E-01        | 2.68E-02       | 1.933  | 5.53E-02        | 2.34E-02   | 1.734  | 8.51E-02        |
|            | STAR     | ILMN_1701895 | 5.65E-03        | 0.963  | 3.37E-01        | 1.17E-02  | 1.907  | 5.85E-02        | 6.65E-03       | 1.189  | 2.37E-01        | 3.14E-03   | 0.416  | 6.78E-01        |
|            | LSM1     | ILMN_1738956 | 1.19E-02        | 1.073  | 2.85E-01        | 1.88E-02  | 1.650  | 1.01E-01        | -2.48E-03      | -0.231 | 8.18E-01        | 1.51E-02   | 1.221  | 2.24E-01        |
|            | BAG4     | ILMN_1727996 | -4.29E-02       | -1.677 | 9.58E-02        | -8.99E-03 | -0.363 | 7.17E-01        | -7.58E-03      | -0.259 | 7.96E-01        | -3.24E-02  | -1.082 | 2.81E-01        |
|            | DDHD2    | ILMN_1705871 | 1.64E-02        | 1.625  | 1.06E-01        | -1.68E-02 | -1.277 | 2.04E-01        | 5.95E-03       | 0.670  | 5.04E-01        | 8.63E-03   | 0.774  | 4.40E-01        |
|            | PPAPDC1B | ILMN_1675406 | 9.88E-03        | 1.297  | 1.97E-01        | 1.08E-02  | 1.317  | 1.90E-01        | 8.79E-03       | 0.994  | 3.22E-01        | 3.17E-02   | 2.478  | <b>1.44E-02</b> |
|            | WHSC1L1  | ILMN_1666715 | 8.14E-03        | 1.404  | 1.63E-01        | 1.74E-02  | 2.330  | <b>2.13E-02</b> | 7.98E-03       | 1.185  | 2.38E-01        | 7.76E-03   | 0.826  | 4.10E-01        |
|            | LETM2    | ILMN_1714223 | 5.81E-03        | 0.861  | 3.91E-01        | 1.66E-02  | 1.958  | 5.22E-02        | 1.68E-02       | 2.143  | <b>3.38E-02</b> | 1.16E-02   | 1.404  | 1.63E-01        |
|            | FGFR1    | ILMN_1729369 | -2.09E-03       | -0.406 | 6.85E-01        | 1.44E-02  | 1.496  | 1.37E-01        | 7.78E-03       | 0.923  | 3.57E-01        | 3.46E-03   | 0.430  | 6.68E-01        |

BETA, Regression coefficient; STAT, Coefficient t-statistic; P, Asymptotic p-value for t-statistic.

**Supplementary Table 8. Results of SNPs with  $P < 0.05$  of MHC region on chromosome 6p21.3-22.1 in Stage 1.**

| CHR | SNP        | POSITION | A1 | P        | P (R)    | OR   | OR (R) | Q    |
|-----|------------|----------|----|----------|----------|------|--------|------|
| 6   | rs10484435 | 26139790 | C  | 1.09E-02 | 2.34E-02 | 1.48 | 1.47   | 0.27 |
| 6   | rs2230654  | 26141620 | A  | 3.63E-02 | 3.63E-02 | 0.86 | 0.86   | 0.43 |
| 6   | rs7749823  | 26266058 | C  | 4.18E-05 | 4.18E-05 | 0.62 | 0.62   | 0.61 |
| 6   | rs17598927 | 26292619 | C  | 1.45E-02 | 1.68E-02 | 1.18 | 1.18   | 0.31 |
| 6   | rs1543681  | 26295762 | G  | 4.30E-03 | 1.41E-02 | 0.83 | 0.83   | 0.24 |
| 6   | rs2143346  | 26306428 | C  | 5.25E-03 | 5.25E-03 | 1.21 | 1.21   | 0.59 |
| 6   | rs1997768  | 26325707 | C  | 3.68E-03 | 4.27E-03 | 1.21 | 1.21   | 0.31 |
| 6   | rs2143345  | 26337127 | T  | 2.52E-04 | 1.84E-03 | 1.29 | 1.29   | 0.24 |
| 6   | rs16891467 | 26343945 | C  | 8.94E-04 | 8.94E-04 | 1.26 | 1.26   | 0.35 |
| 6   | rs3734534  | 26348628 | A  | 3.33E-02 | 3.33E-02 | 1.25 | 1.25   | 0.78 |
| 6   | rs11759720 | 26358233 | G  | 5.61E-03 | 5.61E-03 | 1.20 | 1.20   | 0.36 |
| 6   | rs9467704  | 26427465 | A  | 1.26E-02 | 1.26E-02 | 0.73 | 0.73   | 0.71 |
| 6   | rs6929846  | 26566244 | A  | 8.85E-05 | 8.85E-05 | 0.71 | 0.71   | 0.97 |
| 6   | rs6907857  | 26580329 | G  | 2.27E-02 | 2.27E-02 | 0.81 | 0.81   | 0.39 |
| 6   | rs7773913  | 26581962 | T  | 9.20E-03 | 9.20E-03 | 0.76 | 0.76   | 1.00 |
| 6   | rs16894368 | 27229203 | A  | 8.83E-03 | 8.83E-03 | 0.78 | 0.78   | 0.49 |
| 6   | rs6917419  | 27351459 | T  | 1.42E-02 | 1.42E-02 | 0.86 | 0.86   | 0.54 |
| 6   | rs200991   | 27923473 | A  | 1.37E-02 | 1.37E-02 | 1.14 | 1.14   | 0.58 |
| 6   | rs200956   | 27947725 | G  | 6.32E-03 | 6.32E-03 | 1.15 | 1.15   | 0.38 |
| 6   | rs203885   | 28184865 | T  | 2.71E-02 | 2.71E-02 | 1.14 | 1.14   | 0.39 |
| 6   | rs203884   | 28185353 | T  | 7.84E-04 | 1.82E-02 | 1.15 | 1.15   | 0.15 |
| 6   | rs1150683  | 28263293 | A  | 1.17E-02 | 1.72E-02 | 1.16 | 1.16   | 0.33 |
| 6   | rs9295762  | 28263397 | C  | 3.65E-02 | 4.19E-02 | 1.10 | 1.10   | 0.35 |
| 6   | rs2299030  | 28306734 | G  | 2.85E-02 | 2.85E-02 | 1.21 | 1.21   | 0.79 |
| 6   | rs7759855  | 28390842 | C  | 5.00E-05 | 5.00E-05 | 0.68 | 0.68   | 0.81 |

|   |            |          |   |          |          |      |      |      |
|---|------------|----------|---|----------|----------|------|------|------|
| 6 | rs9468344  | 28417548 | C | 1.40E-02 | 1.40E-02 | 0.91 | 0.91 | 0.86 |
| 6 | rs6901001  | 28419098 | G | 1.67E-04 | 2.24E-04 | 0.73 | 0.73 | 0.36 |
| 6 | rs6918631  | 28420435 | A | 1.06E-04 | 1.06E-04 | 0.69 | 0.69 | 0.83 |
| 6 | rs2021745  | 28534965 | G | 4.90E-02 | 4.90E-02 | 0.93 | 0.93 | 0.80 |
| 6 | rs6927023  | 28562200 | T | 2.93E-05 | 2.93E-05 | 0.67 | 0.67 | 0.61 |
| 6 | rs454182   | 28619143 | C | 4.10E-02 | 4.10E-02 | 1.09 | 1.09 | 0.40 |
| 6 | rs732395   | 28724306 | T | 1.82E-02 | 1.82E-02 | 0.90 | 0.90 | 0.91 |
| 6 | rs7761914  | 28750488 | G | 1.04E-04 | 1.04E-04 | 0.69 | 0.69 | 0.84 |
| 6 | rs2269554  | 29102968 | T | 2.96E-02 | 2.96E-02 | 0.92 | 0.92 | 0.59 |
| 6 | rs10484544 | 29103698 | C | 4.29E-02 | 4.29E-02 | 0.93 | 0.93 | 0.56 |
| 6 | rs16894557 | 29107805 | A | 6.78E-03 | 8.75E-03 | 0.90 | 0.90 | 0.34 |
| 6 | rs2394514  | 29131193 | C | 1.31E-06 | 1.16E-05 | 1.39 | 1.39 | 0.27 |
| 6 | rs3116816  | 29257421 | T | 2.43E-02 | 2.43E-02 | 0.92 | 0.92 | 0.69 |
| 6 | rs2107192  | 29541921 | T | 4.11E-02 | 4.11E-02 | 0.89 | 0.89 | 0.53 |
| 6 | rs11961013 | 29579913 | T | 5.10E-03 | 3.11E-02 | 1.37 | 1.37 | 0.20 |
| 6 | rs3025657  | 29619195 | C | 9.46E-06 | 3.70E-02 | 0.75 | 0.75 | 0.01 |
| 6 | rs29225    | 29689020 | G | 1.11E-02 | 1.11E-02 | 0.86 | 0.86 | 0.53 |
| 6 | rs29273    | 29718968 | G | 2.28E-02 | 2.28E-02 | 1.28 | 1.28 | 0.84 |
| 6 | rs3129090  | 29772110 | A | 3.24E-02 | 3.24E-02 | 1.25 | 1.25 | 0.74 |
| 6 | rs3116788  | 29782176 | G | 3.62E-04 | 3.62E-04 | 0.82 | 0.82 | 0.60 |
| 6 | rs9258126  | 29783770 | C | 2.63E-02 | 2.63E-02 | 1.26 | 1.26 | 0.78 |
| 6 | rs6457009  | 29784516 | T | 6.70E-03 | 6.70E-03 | 1.11 | 1.11 | 0.56 |
| 6 | rs7762253  | 29784802 | T | 2.95E-02 | 2.95E-02 | 1.09 | 1.09 | 0.76 |
| 6 | rs3871467  | 29785228 | A | 7.27E-03 | 7.27E-03 | 1.11 | 1.11 | 0.47 |
| 6 | rs1610593  | 29786499 | T | 2.22E-03 | 3.89E-02 | 0.87 | 0.87 | 0.12 |
| 6 | rs1611381  | 29788471 | T | 2.25E-03 | 1.99E-02 | 0.87 | 0.87 | 0.18 |
| 6 | rs1611388  | 29788768 | G | 2.47E-03 | 4.24E-02 | 0.87 | 0.88 | 0.11 |
| 6 | rs2072898  | 29800708 | G | 2.08E-04 | 5.14E-04 | 0.83 | 0.83 | 0.32 |
| 6 | rs2272874  | 29804224 | C | 2.85E-03 | 2.85E-03 | 0.87 | 0.87 | 0.71 |
| 6 | rs2743925  | 29806029 | C | 1.87E-02 | 1.87E-02 | 1.22 | 1.22 | 0.98 |

|   |            |          |   |          |          |      |      |      |
|---|------------|----------|---|----------|----------|------|------|------|
| 6 | rs9258205  | 29811802 | G | 1.80E-04 | 1.80E-04 | 0.84 | 0.84 | 0.39 |
| 6 | rs1736913  | 29812379 | T | 4.60E-05 | 4.60E-05 | 0.80 | 0.80 | 0.55 |
| 6 | rs9258215  | 29815286 | C | 5.74E-03 | 1.50E-02 | 0.86 | 0.86 | 0.26 |
| 6 | rs2523386  | 29819726 | A | 4.38E-02 | 4.38E-02 | 1.33 | 1.33 | 0.40 |
| 6 | rs2844845  | 29820738 | A | 2.04E-02 | 2.04E-02 | 1.29 | 1.29 | 0.94 |
| 6 | rs1610630  | 29837265 | G | 1.57E-02 | 1.57E-02 | 1.29 | 1.29 | 0.94 |
| 6 | rs1737055  | 29841721 | T | 3.50E-02 | 3.50E-02 | 0.92 | 0.92 | 0.86 |
| 6 | rs1737030  | 29845542 | T | 3.70E-02 | 3.70E-02 | 0.92 | 0.92 | 0.43 |
| 6 | rs1633002  | 29873026 | A | 3.74E-03 | 3.74E-03 | 1.20 | 1.20 | 0.97 |
| 6 | rs1632973  | 29885150 | A | 3.19E-03 | 3.19E-03 | 1.20 | 1.20 | 0.96 |
| 6 | rs1736963  | 29885962 | A | 9.22E-03 | 9.22E-03 | 1.17 | 1.17 | 0.66 |
| 6 | rs9258466  | 29886192 | G | 1.08E-02 | 1.08E-02 | 1.17 | 1.17 | 0.85 |
| 6 | rs3926748  | 29888311 | T | 1.20E-02 | 1.83E-02 | 0.89 | 0.89 | 0.33 |
| 6 | rs753544   | 29888508 | A | 1.31E-03 | 1.31E-03 | 1.22 | 1.22 | 0.79 |
| 6 | rs1318083  | 29891198 | T | 4.45E-03 | 4.45E-03 | 1.20 | 1.20 | 0.87 |
| 6 | rs2517898  | 29907725 | G | 1.86E-05 | 2.68E-04 | 0.83 | 0.83 | 0.24 |
| 6 | rs2254071  | 29914041 | C | 6.63E-05 | 6.63E-05 | 0.86 | 0.86 | 0.91 |
| 6 | rs407238   | 29914880 | C | 2.26E-04 | 2.26E-04 | 1.23 | 1.23 | 0.79 |
| 6 | rs2734990  | 29920484 | T | 2.14E-02 | 2.14E-02 | 0.91 | 0.91 | 0.42 |
| 6 | rs2523767  | 29920786 | G | 3.95E-02 | 3.95E-02 | 0.89 | 0.89 | 0.32 |
| 6 | rs2523765  | 29925085 | A | 3.63E-03 | 3.63E-03 | 1.19 | 1.19 | 0.47 |
| 6 | rs3094159  | 29943813 | C | 4.51E-03 | 1.08E-02 | 0.90 | 0.90 | 0.29 |
| 6 | rs3094157  | 29944218 | C | 3.52E-02 | 3.52E-02 | 1.28 | 1.28 | 0.39 |
| 6 | rs3132718  | 29944556 | A | 3.03E-03 | 6.65E-03 | 0.89 | 0.89 | 0.30 |
| 6 | rs1611637  | 29944720 | T | 2.22E-02 | 2.22E-02 | 0.91 | 0.91 | 0.44 |
| 6 | rs1655902  | 30024834 | G | 5.71E-03 | 5.71E-03 | 1.24 | 1.24 | 0.55 |
| 6 | rs2256902  | 30048351 | A | 7.97E-04 | 1.32E-02 | 0.82 | 0.81 | 0.15 |
| 6 | rs9261035  | 30074154 | T | 1.47E-02 | 1.47E-02 | 1.37 | 1.37 | 0.69 |
| 6 | rs6925061  | 30100265 | T | 1.17E-02 | 1.17E-02 | 1.35 | 1.35 | 0.50 |
| 6 | rs11965452 | 30119781 | T | 2.45E-04 | 3.98E-02 | 0.78 | 0.78 | 0.05 |

|   |            |          |   |          |          |      |      |      |
|---|------------|----------|---|----------|----------|------|------|------|
| 6 | rs9261265  | 30134329 | G | 1.16E-02 | 1.16E-02 | 1.35 | 1.35 | 0.50 |
| 6 | rs9261317  | 30156284 | A | 1.78E-03 | 1.78E-03 | 1.50 | 1.50 | 0.75 |
| 6 | rs6923832  | 30170037 | A | 1.75E-02 | 1.75E-02 | 1.33 | 1.33 | 0.60 |
| 6 | rs12663184 | 30409579 | T | 2.80E-02 | 2.80E-02 | 1.16 | 1.16 | 0.76 |
| 6 | rs4713325  | 30491421 | G | 2.14E-02 | 2.14E-02 | 0.88 | 0.88 | 0.51 |
| 6 | rs4713328  | 30491855 | A | 7.51E-03 | 7.51E-03 | 0.88 | 0.88 | 0.64 |
| 6 | rs2157605  | 30562055 | G | 4.12E-03 | 4.12E-03 | 0.88 | 0.88 | 0.53 |
| 6 | rs11757629 | 30852508 | G | 8.43E-04 | 8.43E-04 | 0.75 | 0.75 | 0.45 |
| 6 | rs4947289  | 30899388 | A | 5.64E-04 | 3.71E-02 | 1.18 | 1.20 | 0.08 |
| 6 | rs2530709  | 31048548 | G | 2.76E-03 | 3.80E-02 | 0.89 | 0.87 | 0.08 |
| 6 | rs12528087 | 31088582 | T | 4.98E-02 | 4.98E-02 | 1.22 | 1.22 | 0.93 |
| 6 | rs9262545  | 31101041 | T | 3.75E-02 | 3.75E-02 | 1.17 | 1.17 | 0.87 |
| 6 | rs2523897  | 31101937 | T | 6.68E-03 | 6.68E-03 | 1.12 | 1.12 | 0.45 |
| 6 | rs6457300  | 31106721 | G | 4.70E-02 | 4.70E-02 | 0.90 | 0.90 | 0.49 |
| 6 | rs3130991  | 31195333 | G | 2.78E-02 | 2.78E-02 | 0.90 | 0.90 | 0.94 |
| 6 | rs9263715  | 31203780 | A | 5.48E-04 | 5.48E-04 | 1.14 | 1.14 | 0.57 |
| 6 | rs9263716  | 31203795 | T | 2.56E-02 | 2.56E-02 | 1.11 | 1.11 | 0.33 |
| 6 | rs3095238  | 31269189 | T | 3.04E-03 | 1.68E-02 | 1.20 | 1.21 | 0.21 |
| 6 | rs4516988  | 31284581 | C | 1.75E-02 | 1.75E-02 | 0.76 | 0.76 | 0.40 |
| 6 | rs9501522  | 31292404 | A | 3.87E-02 | 3.87E-02 | 0.81 | 0.81 | 0.53 |
| 6 | rs2394894  | 31314899 | C | 1.19E-02 | 1.19E-02 | 1.12 | 1.12 | 0.90 |
| 6 | rs2394895  | 31314958 | G | 1.16E-02 | 1.16E-02 | 1.12 | 1.12 | 0.89 |
| 6 | rs3134762  | 31318845 | G | 1.24E-02 | 1.24E-02 | 1.12 | 1.12 | 0.95 |
| 6 | rs2246954  | 31373241 | T | 2.43E-02 | 2.43E-02 | 1.09 | 1.09 | 0.43 |
| 6 | rs2524123  | 31373293 | C | 1.98E-02 | 1.98E-02 | 1.09 | 1.09 | 0.73 |
| 6 | rs2524095  | 31374096 | A | 7.84E-03 | 1.29E-02 | 1.12 | 1.12 | 0.32 |
| 6 | rs16899205 | 31374340 | G | 4.10E-03 | 4.47E-02 | 0.89 | 0.88 | 0.09 |
| 6 | rs2524089  | 31374501 | G | 6.37E-03 | 1.46E-02 | 1.12 | 1.12 | 0.28 |
| 6 | rs2524066  | 31377133 | T | 1.45E-02 | 1.67E-02 | 1.11 | 1.11 | 0.35 |
| 6 | rs9366778  | 31377152 | C | 1.97E-02 | 1.97E-02 | 1.09 | 1.09 | 0.49 |

|   |            |          |   |          |          |      |      |      |
|---|------------|----------|---|----------|----------|------|------|------|
| 6 | rs2844569  | 31444583 | A | 3.85E-02 | 3.85E-02 | 1.12 | 1.12 | 0.84 |
| 6 | rs2844546  | 31452636 | A | 2.18E-02 | 2.18E-02 | 1.11 | 1.11 | 0.50 |
| 6 | rs2507984  | 31453575 | A | 1.96E-02 | 1.96E-02 | 1.12 | 1.12 | 0.75 |
| 6 | rs2442749  | 31460019 | G | 6.65E-04 | 6.65E-04 | 1.17 | 1.17 | 0.65 |
| 6 | rs2857605  | 31632830 | C | 4.23E-02 | 4.23E-02 | 1.12 | 1.12 | 0.51 |
| 6 | rs13215091 | 31636669 | T | 3.20E-02 | 3.20E-02 | 1.17 | 1.17 | 0.52 |
| 6 | rs9348876  | 31683255 | A | 4.71E-02 | 4.91E-02 | 1.09 | 1.09 | 0.36 |
| 6 | rs2857597  | 31692979 | T | 1.17E-02 | 2.57E-02 | 1.25 | 1.26 | 0.25 |
| 6 | rs1046089  | 31710946 | T | 1.19E-02 | 1.19E-02 | 0.91 | 0.91 | 0.47 |
| 6 | rs805301   | 31726100 | G | 4.55E-03 | 4.55E-03 | 0.90 | 0.90 | 0.47 |
| 6 | rs707922   | 31733486 | A | 3.61E-02 | 3.61E-02 | 0.90 | 0.90 | 0.95 |
| 6 | rs707917   | 31765733 | G | 7.96E-03 | 7.96E-03 | 0.90 | 0.90 | 0.43 |
| 6 | rs805293   | 31796497 | A | 2.27E-02 | 2.27E-02 | 1.10 | 1.10 | 0.88 |
| 6 | rs4713479  | 31796778 | T | 4.76E-02 | 4.76E-02 | 0.90 | 0.90 | 0.99 |
| 6 | rs707928   | 31850569 | C | 2.34E-03 | 2.34E-03 | 0.86 | 0.86 | 0.65 |
| 6 | rs9267798  | 32152812 | G | 1.39E-02 | 1.39E-02 | 0.86 | 0.86 | 0.75 |
| 6 | rs12663103 | 32269302 | G | 1.04E-02 | 1.04E-02 | 0.80 | 0.80 | 0.70 |
| 6 | rs206015   | 32290737 | T | 3.94E-02 | 3.94E-02 | 1.09 | 1.09 | 0.47 |
| 6 | rs16870123 | 32467438 | T | 4.41E-02 | 4.41E-02 | 0.77 | 0.77 | 0.50 |
| 6 | rs17577980 | 32467799 | A | 1.93E-03 | 4.41E-02 | 1.26 | 1.28 | 0.11 |
| 6 | rs6929953  | 32499966 | T | 3.44E-02 | 4.32E-02 | 1.19 | 1.20 | 0.32 |
| 6 | rs3177928  | 32520413 | T | 3.04E-03 | 3.04E-03 | 0.66 | 0.66 | 0.90 |
| 6 | rs9268856  | 32537697 | A | 2.81E-02 | 2.81E-02 | 0.89 | 0.89 | 0.88 |
| 6 | rs9268878  | 32539270 | T | 1.13E-02 | 1.13E-02 | 0.88 | 0.88 | 0.94 |
| 6 | rs17210980 | 32665279 | C | 2.03E-02 | 2.03E-02 | 0.88 | 0.88 | 0.87 |
| 6 | rs9469220  | 32766288 | C | 1.76E-03 | 1.76E-03 | 0.89 | 0.89 | 0.58 |
| 6 | rs2856717  | 32778286 | T | 2.79E-02 | 2.79E-02 | 0.91 | 0.91 | 0.39 |
| 6 | rs12663935 | 32783168 | C | 4.93E-02 | 4.93E-02 | 0.73 | 0.73 | 0.44 |
| 6 | rs9275793  | 32798005 | C | 4.39E-02 | 4.39E-02 | 0.88 | 0.88 | 0.58 |
| 6 | rs9276227  | 32808662 | A | 1.06E-02 | 1.06E-02 | 1.22 | 1.22 | 0.50 |

|   |           |          |   |          |          |      |      |      |
|---|-----------|----------|---|----------|----------|------|------|------|
| 6 | rs9276299 | 32811086 | G | 2.01E-02 | 2.01E-02 | 1.20 | 1.20 | 0.88 |
| 6 | rs1383264 | 32847945 | T | 1.89E-03 | 1.89E-03 | 0.84 | 0.84 | 0.92 |
| 6 | rs376877  | 33132584 | C | 1.39E-02 | 1.39E-02 | 0.88 | 0.88 | 0.35 |
| 6 | rs3129274 | 33202847 | C | 7.49E-03 | 7.49E-03 | 0.74 | 0.74 | 0.82 |

Note: 3,750 cases and 6,468 controls were used in stage 1 (i.e. BIOX GWAS), including the Northern Han sample set of 1,578 cases and 1,592 controls; the Central Han sample set of 1,238 cases and 2,856 controls; and the Southern Han sample set of 934 cases and 2,020 controls. P, Fixed-effects meta-analysis p-value; P(R), Random-effects meta-analysis p-value; OR, Fixed-effects OR estimate, OR(R), Random-effects OR estimate; Q, p-value for Cochrane's Q statistic.

### Supplementary Table 9. Genome-wide significant association of markers with schizophrenia in published studies.

| Study                                                                                                                                                        | Initial Sample Size                                                                                                          | Replication Sample Size                                          | Region  | Reported Gene(s)                                                                                | Strongest SNP-Risk Allele | OR <sup>a</sup> | RAF in Controls | P value  |
|--------------------------------------------------------------------------------------------------------------------------------------------------------------|------------------------------------------------------------------------------------------------------------------------------|------------------------------------------------------------------|---------|-------------------------------------------------------------------------------------------------|---------------------------|-----------------|-----------------|----------|
| International Schizophrenia Consortium. July 01, 2009, <b>Nature</b> . Common polygenic variation contributes to risk of schizophrenia and bipolar disorder. | 3,322 European descent cases, 3,587 European descent controls                                                                | 4,692 European descent cases, 15,493 European descent controls   | 6p22.1  | <i>MHC</i>                                                                                      | rs13194053-T              | 1.22            | 0.86            | 9.50E-09 |
|                                                                                                                                                              |                                                                                                                              |                                                                  | 6p21.32 | <i>MHC</i>                                                                                      | rs3130297-C               | 1.34            | 0.89            | 4.79E-08 |
| Shi J. July 01, 2009. <b>Nature</b> . Common variants on chromosome 6p22.1 are associated with schizophrenia.                                                | 2,681 European ancestry cases, 2,653 European ancestry controls, 1,286 African American cases, 973 African American controls | 5,327 European ancestry cases, 16,424 European ancestry controls | 6p22.1  | <i>SLC17A1, SLC17A3, BTN3A2, BTN2A2, BTN3A1, HIST1H2AG, HIST1H2BJ, PRSS16, POM121L2, ZNF184</i> | rs6904071-G               | 1.25            | 0.81            | 1.78E-08 |
|                                                                                                                                                              |                                                                                                                              |                                                                  |         |                                                                                                 | rs926300-T                | 1.26            | 0.81            | 1.06E-08 |
|                                                                                                                                                              |                                                                                                                              |                                                                  |         |                                                                                                 | rs6913660-G               | 1.25            | 0.82            | 2.36E-08 |
|                                                                                                                                                              |                                                                                                                              |                                                                  |         |                                                                                                 | rs13219181-A              | 1.26            | 0.82            | 1.29E-08 |
|                                                                                                                                                              |                                                                                                                              |                                                                  |         |                                                                                                 | rs13194053-T              | 1.28            | 0.82            | 9.54E-09 |
|                                                                                                                                                              |                                                                                                                              |                                                                  |         |                                                                                                 | rs3800307-T               | 1.27            | 0.79            | 4.35E-08 |
|                                                                                                                                                              |                                                                                                                              |                                                                  |         |                                                                                                 | rs3800316-T               | 1.20            | 0.76            | 3.81E-08 |

|                                                                                                  |                                                |                                                 |         |                                      |              |      |      |          |
|--------------------------------------------------------------------------------------------------|------------------------------------------------|-------------------------------------------------|---------|--------------------------------------|--------------|------|------|----------|
| Stefansson H. July 01, 2009.<br><b>Nature.</b> Common variants conferring risk of schizophrenia. | 2,663 European cases, 13,498 European controls | 10,282 European cases, 21,093 European controls | 6p22.1  | <i>MHC, HIST1H2BJ, PRSS16, PGBD1</i> | rs6913660-C  | 1.15 | 0.85 | 1.10E-09 |
|                                                                                                  |                                                |                                                 |         |                                      | rs13219354-T | 1.20 | 0.90 | 1.30E-10 |
|                                                                                                  |                                                |                                                 |         |                                      | rs6932590-T  | 1.16 | 0.78 | 1.40E-12 |
|                                                                                                  |                                                |                                                 |         |                                      | rs13211507-T | 1.24 | 0.92 | 8.30E-11 |
|                                                                                                  |                                                |                                                 | 6p21.32 | <i>MHC, NOTCH4</i>                   | rs3131296-G  | 1.19 | 0.87 | 2.30E-10 |
|                                                                                                  |                                                |                                                 | 11q24.2 | <i>NRGN</i>                          | rs12807809-T | 1.15 | 0.83 | 2.40E-09 |
|                                                                                                  |                                                |                                                 | 18q21.2 | <i>TCF4</i>                          | rs9960767-C  | 1.23 | 0.06 | 4.10E-09 |

<sup>a</sup>For those SNPs with combined p values, but without combined OR values in the original publications, the OR values of the group with largest sample size were listed. RAF, Risk Allele Frequency.

**Supplementary Table 10. Minor allele frequencies (HapMap CEU and HCB samples) of the markers, which are genome-wide significantly associated with schizophrenia in published studies.**

| CHR/Region | SNP        | BP       | Allele | MAF<br>(HapMap-CEU) | MAF<br>(HapMap-HCB) |
|------------|------------|----------|--------|---------------------|---------------------|
| 6p22.1     | rs6904071  | 27155235 | A      | 0.142               | 0                   |
| 6p22.1     | rs926300   | 27167422 | A      | 0.142               | 0                   |
| 6p22.1     | rs6913660  | 27199404 | A      | 0.137               | 0                   |
| 6p22.1     | rs13219181 | 27244204 | G      | 0.142               | 0                   |
| 6p22.1     | rs13194053 | 27251862 | C      | 0.137               | 0                   |
| 6p22.1     | rs13219354 | 27293643 | C      | 0.097               | 0                   |
| 6p22.1     | rs3800307  | 27293771 | A      | 0.159               | 0                   |
| 6p22.1     | rs6932590  | 27356910 | C      | 0.199               | 0.023               |
| 6p22.1     | rs3800316  | 27364081 | C      | 0.208               | 0.023               |
| 6p22.1     | rs13211507 | 28365356 | C      | 0.075               | 0                   |

|         |            |           |   |       |       |
|---------|------------|-----------|---|-------|-------|
| 6p21.32 | rs3130297  | 32280971  | T | 0.093 | 0     |
| 6p21.32 | rs3131296  | 32280971  | A | 0.089 | 0.062 |
| 11q24.2 | rs12807809 | 124111495 | C | 0.175 | 0.233 |
| 18q21.2 | rs9960767  | 51306000  | C | 0.071 | 0.012 |

MAF, Minor allele frequency.

**Supplementary Table 11. R-square values of the SNPs (genome-wide significantly associated with schizophrenia in published studies) with 149 SNPs within MHC region (with P<sub>gwas-meta</sub> < 0.05 in our study) in HapMap HCB samples.**

| CHR | BP       | SNP1       | SNP2      |           |           |
|-----|----------|------------|-----------|-----------|-----------|
|     |          |            | rs6932590 | rs3800316 | rs3131296 |
| 6   | 26139790 | rs10484435 | 0.001     | 0.002     | 0.003     |
| 6   | 26141620 | rs2230654  | 0.007     | 0.011     | 0.005     |
| 6   | 26266058 | rs7749823  | 0.001     | 0.002     | 0.003     |
| 6   | 26292619 | rs17598927 | 0.348     | 0.196     | 0.188     |
| 6   | 26295762 | rs1543681  | 0.021     | 0.082     | 0.023     |
| 6   | 26306428 | rs2143346  | 0.348     | 0.195     | 0.186     |
| 6   | 26325707 | rs1997768  | 0.320     | 0.178     | 0.168     |
| 6   | 26337127 | rs2143345  | 0.384     | 0.224     | 0.220     |
| 6   | 26343945 | rs16891467 | 0.384     | 0.224     | 0.220     |
| 6   | 26348628 | rs3734534  | 0.002     | 0.003     | 0.071     |
| 6   | 26358233 | rs11759720 | 0.295     | 0.160     | 0.148     |
| 6   | 26427465 | rs9467704  | 0.002     | 0.003     | 0.006     |
| 6   | 26566244 | rs6929846  | 0.007     | 0.011     | 0.019     |
| 6   | 26580329 | rs6907857  | 0.005     | 0.007     | 0.012     |

---

|   |          |            |       |       |       |
|---|----------|------------|-------|-------|-------|
| 6 | 26581962 | rs7773913  | 0.005 | 0.007 | 0.012 |
| 6 | 27229203 | rs16894368 | 0.002 | 0.003 | 0.006 |
| 6 | 27351459 | rs6917419  | 0.009 | 0.017 | 0.023 |
| 6 | 27923473 | rs200991   | 0.023 | 0.000 | 0.010 |
| 6 | 27947725 | rs200956   | 0.026 | 0.000 | 0.013 |
| 6 | 28184865 | rs203885   | 0.005 | 0.007 | 0.149 |
| 6 | 28185353 | rs203884   | 0.037 | 0.037 | 0.003 |
| 6 | 28263293 | rs1150683  | 0.006 | 0.009 | 0.303 |
| 6 | 28263397 | rs9295762  | 0.041 | 0.165 | 0.002 |
| 6 | 28306734 | rs2299030  | 0.007 | 0.011 | 0.005 |
| 6 | 28390842 | rs7759855  | 0.005 | 0.007 | 0.012 |
| 6 | 28417548 | rs9468344  | 0.003 | 0.005 | 0.000 |
| 6 | 28419098 | rs6901001  | 0.005 | 0.007 | 0.012 |
| 6 | 28420435 | rs6918631  | 0.005 | 0.007 | 0.012 |
| 6 | 28534965 | rs2021745  | 0.064 | 0.014 | 0.025 |
| 6 | 28562200 | rs6927023  | 0.005 | 0.007 | 0.012 |
| 6 | 28619143 | rs454182   | 0.032 | 0.001 | 0.001 |
| 6 | 28724306 | rs732395   | 0.066 | 0.101 | 0.017 |
| 6 | 28750488 | rs7761914  | 0.006 | 0.009 | 0.016 |
| 6 | 29102968 | rs2269554  | 0.053 | 0.082 | 0.080 |
| 6 | 29103698 | rs10484544 | 0.053 | 0.082 | 0.080 |
| 6 | 29107805 | rs16894557 | 0.037 | 0.058 | 0.101 |
| 6 | 29131193 | rs2394514  | 0.114 | 0.176 | 0.008 |
| 6 | 29257421 | rs3116816  | 0.053 | 0.082 | 0.080 |
| 6 | 29541921 | rs2107192  | 0.003 | 0.022 | 0.010 |
| 6 | 29579913 | rs11961013 | 0.477 | 0.294 | 0.780 |
| 6 | 29619195 | rs3025657  | 0.026 | 0.008 | 0.000 |
| 6 | 29689020 | rs29225    | 0.015 | 0.000 | 0.039 |

---

---

|   |          |           |       |       |       |
|---|----------|-----------|-------|-------|-------|
| 6 | 29718968 | rs29273   | 0.002 | 0.003 | 0.071 |
| 6 | 29772110 | rs3129090 | 0.004 | 0.006 | 0.034 |
| 6 | 29782176 | rs3116788 | 0.001 | 0.008 | 0.032 |
| 6 | 29783770 | rs9258126 | 0.002 | 0.003 | 0.071 |
| 6 | 29784516 | rs6457009 | 0.005 | 0.040 | 0.147 |
| 6 | 29784802 | rs7762253 | 0.005 | 0.040 | 0.147 |
| 6 | 29785228 | rs3871467 | 0.005 | 0.040 | 0.147 |
| 6 | 29788471 | rs1611381 | 0.001 | 0.008 | 0.032 |
| 6 | 29788768 | rs1611388 | 0.001 | 0.008 | 0.032 |
| 6 | 29800708 | rs2072898 | 0.018 | 0.003 | 0.002 |
| 6 | 29804224 | rs2272874 | 0.000 | 0.003 | 0.019 |
| 6 | 29806029 | rs2743925 | 0.002 | 0.003 | 0.071 |
| 6 | 29811802 | rs9258205 | 0.000 | 0.003 | 0.019 |
| 6 | 29812379 | rs1736913 | 0.001 | 0.001 | 0.036 |
| 6 | 29815286 | rs9258215 | 0.000 | 0.003 | 0.019 |
| 6 | 29819726 | rs2523386 | 0.002 | 0.003 | 0.071 |
| 6 | 29820738 | rs2844845 | 0.002 | 0.003 | 0.071 |
| 6 | 29837265 | rs1610630 | 0.005 | 0.007 | 0.012 |
| 6 | 29841721 | rs1737055 | 0.005 | 0.002 | 0.037 |
| 6 | 29845542 | rs1737030 | 0.004 | 0.002 | 0.039 |
| 6 | 29873026 | rs1633002 | 0.115 | 0.177 | 0.497 |
| 6 | 29885150 | rs1632973 | 0.104 | 0.160 | 0.454 |
| 6 | 29885962 | rs1736963 | 0.104 | 0.160 | 0.454 |
| 6 | 29886192 | rs9258466 | 0.104 | 0.160 | 0.454 |
| 6 | 29888311 | rs3926748 | 0.064 | 0.021 | 0.000 |
| 6 | 29888508 | rs753544  | 0.104 | 0.160 | 0.454 |
| 6 | 29891198 | rs1318083 | 0.104 | 0.160 | 0.454 |
| 6 | 29907725 | rs2517898 | 0.001 | 0.001 | 0.021 |

---

---

|   |          |            |       |       |       |
|---|----------|------------|-------|-------|-------|
| 6 | 29914041 | rs2254071  | 0.001 | 0.001 | 0.021 |
| 6 | 29920484 | rs2734990  | 0.008 | 0.012 | 0.005 |
| 6 | 29920786 | rs2523767  | 0.008 | 0.012 | 0.005 |
| 6 | 29925085 | rs2523765  | 0.049 | 0.009 | 0.131 |
| 6 | 29943813 | rs3094159  | 0.014 | 0.039 | 0.101 |
| 6 | 29944218 | rs3094157  | 0.005 | 0.007 | 0.012 |
| 6 | 29944556 | rs3132718  | 0.014 | 0.039 | 0.101 |
| 6 | 30024834 | rs1655902  | 0.186 | 0.097 | 0.500 |
| 6 | 30048351 | rs2256902  | 0.016 | 0.001 | 0.004 |
| 6 | 30074154 | rs9261035  | 0.002 | 0.003 | 0.006 |
| 6 | 30100265 | rs6925061  | 0.002 | 0.003 | 0.006 |
| 6 | 30119781 | rs11965452 | 0.128 | 0.058 | 0.344 |
| 6 | 30134329 | rs9261265  | 0.002 | 0.003 | 0.006 |
| 6 | 30156284 | rs9261317  | 0.002 | 0.004 | 0.005 |
| 6 | 30170037 | rs6923832  | 0.002 | 0.003 | 0.006 |
| 6 | 30409579 | rs12663184 | 0.004 | 0.154 | 0.011 |
| 6 | 30491421 | rs4713325  | 0.000 | 0.005 | 0.027 |
| 6 | 30491855 | rs4713328  | 0.000 | 0.005 | 0.027 |
| 6 | 30562055 | rs2157605  | 0.000 | 0.006 | 0.032 |
| 6 | 30852508 | rs11757629 | 0.006 | 0.009 | 0.016 |
| 6 | 30899388 | rs4947289  | 0.030 | 0.073 | 0.109 |
| 6 | 31048548 | rs2530709  | 0.002 | 0.006 | 0.001 |
| 6 | 31088582 | rs12528087 | 0.010 | 0.015 | 0.027 |
| 6 | 31101937 | rs2523897  | 0.048 | 0.006 | 0.170 |
| 6 | 31106721 | rs6457300  | 0.000 | 0.007 | 0.005 |
| 6 | 31195333 | rs3130991  | 0.011 | 0.006 | 0.047 |
| 6 | 31203780 | rs9263715  | 0.032 | 0.083 | 0.059 |
| 6 | 31203795 | rs9263716  | 0.037 | 0.094 | 0.069 |

---

---

|   |          |            |       |       |       |
|---|----------|------------|-------|-------|-------|
| 6 | 31269189 | rs3095238  | 0.028 | 0.043 | 0.076 |
| 6 | 31284581 | rs4516988  | 0.010 | 0.012 | 0.027 |
| 6 | 31292404 | rs9501522  | 0.006 | 0.009 | 0.016 |
| 6 | 31314899 | rs2394894  | 0.064 | 0.017 | 0.171 |
| 6 | 31314958 | rs2394895  | 0.069 | 0.020 | 0.144 |
| 6 | 31318845 | rs3134762  | 0.064 | 0.017 | 0.171 |
| 6 | 31373241 | rs2246954  | 0.005 | 0.007 | 0.129 |
| 6 | 31373293 | rs2524123  | 0.000 | 0.025 | 0.059 |
| 6 | 31374096 | rs2524095  | 0.015 | 0.023 | 0.108 |
| 6 | 31374340 | rs16899205 | 0.030 | 0.004 | 0.007 |
| 6 | 31374501 | rs2524089  | 0.015 | 0.023 | 0.108 |
| 6 | 31377133 | rs2524066  | 0.016 | 0.024 | 0.105 |
| 6 | 31377152 | rs9366778  | 0.000 | 0.026 | 0.062 |
| 6 | 31444583 | rs2844569  | 0.008 | 0.001 | 0.004 |
| 6 | 31452636 | rs2844546  | 0.000 | 0.004 | 0.026 |
| 6 | 31453575 | rs2507984  | 0.000 | 0.004 | 0.026 |
| 6 | 31460019 | rs2442749  | 0.000 | 0.003 | 0.033 |
| 6 | 31632830 | rs2857605  | 0.026 | 0.008 | 0.000 |
| 6 | 31636669 | rs13215091 | 0.042 | 0.017 | 0.002 |
| 6 | 31683255 | rs9348876  | 0.002 | 0.018 | 0.070 |
| 6 | 31692979 | rs2857597  | 0.003 | 0.005 | 0.009 |
| 6 | 31710946 | rs1046089  | 0.075 | 0.014 | 0.257 |
| 6 | 31726100 | rs805301   | 0.073 | 0.014 | 0.251 |
| 6 | 31733486 | rs707922   | 0.012 | 0.018 | 0.000 |
| 6 | 31765733 | rs707917   | 0.073 | 0.014 | 0.251 |
| 6 | 31796497 | rs805293   | 0.005 | 0.011 | 0.030 |
| 6 | 31796778 | rs4713479  | 0.013 | 0.020 | 0.000 |
| 6 | 31850569 | rs707928   | 0.011 | 0.002 | 0.001 |

---

---

|   |          |            |       |       |       |
|---|----------|------------|-------|-------|-------|
| 6 | 32152812 | rs9267798  | 0.017 | 0.027 | 0.006 |
| 6 | 32269302 | rs12663103 | 0.003 | 0.005 | 0.009 |
| 6 | 32290737 | rs206015   | 0.006 | 0.002 | 0.045 |
| 6 | 32467438 | rs16870123 | 0.004 | 0.006 | 0.011 |
| 6 | 32467799 | rs17577980 | 0.002 | 0.003 | 0.005 |
| 6 | 32499966 | rs6929953  | 0.014 | 0.022 | 0.029 |
| 6 | 32520413 | rs3177928  | 0.002 | 0.003 | 0.006 |
| 6 | 32537697 | rs9268856  | 0.000 | 0.007 | 0.001 |
| 6 | 32539270 | rs9268878  | 0.000 | 0.007 | 0.001 |
| 6 | 32665279 | rs17210980 | 0.030 | 0.046 | 0.026 |
| 6 | 32766288 | rs9469220  | 0.054 | 0.000 | 0.073 |
| 6 | 32778286 | rs2856717  | 0.018 | 0.013 | 0.048 |
| 6 | 32783168 | rs12663935 | 0.002 | 0.003 | 0.006 |
| 6 | 32798005 | rs9275793  | 0.008 | 0.042 | 0.005 |
| 6 | 32808662 | rs9276227  | 0.039 | 0.014 | 0.050 |
| 6 | 32811086 | rs9276299  | 0.007 | 0.011 | 0.019 |
| 6 | 32847945 | rs1383264  | 0.020 | 0.031 | 0.000 |
| 6 | 33132584 | rs376877   | 0.017 | 0.000 | 0.047 |
| 6 | 33202847 | rs3129274  | 0.005 | 0.007 | 0.012 |

---

**Supplementary Table 12. R-square values of the SNPs (genome-wide significantly associated with schizophrenia in published studies) with 149 SNPs within MHC region (with P<sub>gwas-meta</sub> < 0.05 in our study) in HapMap CEU samples.**

| CHR | BP       | SNP1       | SNP2      |          |           |            |            |            |           |           |            |           |           |           |
|-----|----------|------------|-----------|----------|-----------|------------|------------|------------|-----------|-----------|------------|-----------|-----------|-----------|
|     |          |            | rs6904071 | rs926300 | rs6913660 | rs13219181 | rs13194053 | rs13219354 | rs3800307 | rs6932590 | rs13211507 | rs3800316 | rs3131296 | rs3130297 |
| 6   | 26139790 | rs10484435 | 0.440     | 0.440    | 0.440     | 0.440      | 0.440      | 0.512      | 0.442     | 0.367     | 0.765      | 0.312     | 0.166     | 0.193     |
| 6   | 26141620 | rs2230654  | 0.013     | 0.013    | 0.013     | 0.013      | 0.013      | 0.007      | 0.006     | 0.001     | 0.018      | 0.000     | 0.063     | 0.059     |
| 6   | 26266058 | rs7749823  | 0.644     | 0.644    | 0.644     | 0.644      | 0.644      | 0.626      | 0.527     | 0.623     | 0.787      | 0.625     | 0.126     | 0.150     |
| 6   | 26292619 | rs17598927 | 0.002     | 0.002    | 0.002     | 0.002      | 0.002      | 0.000      | 0.003     | 0.004     | 0.000      | 0.002     | 0.004     | 0.007     |
| 6   | 26295762 | rs1543681  | 0.072     | 0.072    | 0.072     | 0.072      | 0.072      | 0.082      | 0.062     | 0.034     | 0.081      | 0.030     | 0.004     | 0.016     |
| 6   | 26306428 | rs2143346  | 0.007     | 0.007    | 0.007     | 0.007      | 0.007      | 0.020      | 0.003     | 0.001     | 0.011      | 0.002     | 0.002     | 0.001     |
| 6   | 26325707 | rs1997768  | 0.000     | 0.000    | 0.000     | 0.000      | 0.000      | 0.000      | 0.006     | 0.007     | 0.010      | 0.004     | 0.037     | 0.033     |
| 6   | 26337127 | rs2143345  | 0.000     | 0.000    | 0.000     | 0.000      | 0.000      | 0.000      | 0.006     | 0.007     | 0.010      | 0.004     | 0.037     | 0.033     |
| 6   | 26343945 | rs16891467 | 0.000     | 0.000    | 0.000     | 0.000      | 0.000      | 0.000      | 0.006     | 0.007     | 0.010      | 0.004     | 0.037     | 0.033     |
| 6   | 26348628 | rs3734534  | 0.013     | 0.013    | 0.013     | 0.013      | 0.013      | 0.007      | 0.000     | 0.011     | 0.018      | 0.007     | 0.021     | 0.018     |
| 6   | 26358233 | rs11759720 | 0.001     | 0.001    | 0.001     | 0.001      | 0.001      | 0.004      | 0.001     | 0.023     | 0.022      | 0.015     | 0.061     | 0.055     |
| 6   | 26427465 | rs9467704  | 0.717     | 0.717    | 0.717     | 0.717      | 0.717      | 0.814      | 0.602     | 0.513     | 1.000      | 0.440     | 0.190     | 0.219     |
| 6   | 26566244 | rs6929846  | 0.047     | 0.047    | 0.047     | 0.047      | 0.047      | 0.099      | 0.072     | 0.040     | 0.083      | 0.022     | 0.100     | 0.094     |
| 6   | 27229203 | rs16894368 | 0.032     | 0.032    | 0.032     | 0.032      | 0.032      | 0.004      | 0.028     | 0.022     | 0.004      | 0.132     | 0.004     | 0.004     |
| 6   | 27351459 | rs6917419  | 0.000     | 0.000    | 0.000     | 0.000      | 0.000      | 0.002      | 0.003     | 0.011     | 0.000      | 0.003     | 0.030     | 0.003     |
| 6   | 27923473 | rs200991   | 0.410     | 0.410    | 0.410     | 0.410      | 0.410      | 0.489      | 0.387     | 0.372     | 0.637      | 0.312     | 0.108     | 0.132     |
| 6   | 27947725 | rs200956   | 0.402     | 0.402    | 0.402     | 0.402      | 0.402      | 0.482      | 0.377     | 0.362     | 0.633      | 0.302     | 0.127     | 0.156     |
| 6   | 28184865 | rs203885   | 0.007     | 0.007    | 0.007     | 0.007      | 0.007      | 0.005      | 0.013     | 0.019     | 0.002      | 0.019     | 0.002     | 0.001     |
| 6   | 28185353 | rs203884   | 0.183     | 0.183    | 0.183     | 0.183      | 0.183      | 0.202      | 0.144     | 0.114     | 0.310      | 0.112     | 0.108     | 0.080     |
| 6   | 28263293 | rs1150683  | 0.007     | 0.007    | 0.007     | 0.007      | 0.007      | 0.005      | 0.013     | 0.019     | 0.002      | 0.019     | 0.002     | 0.001     |
| 6   | 28263397 | rs9295762  | 0.220     | 0.220    | 0.220     | 0.220      | 0.220      | 0.233      | 0.186     | 0.196     | 0.336      | 0.191     | 0.121     | 0.089     |
| 6   | 28306734 | rs2299030  | 0.007     | 0.007    | 0.007     | 0.007      | 0.007      | 0.005      | 0.013     | 0.003     | 0.002      | 0.004     | 0.025     | 0.023     |
| 6   | 28417548 | rs9468344  | 0.158     | 0.158    | 0.158     | 0.158      | 0.158      | 0.210      | 0.132     | 0.276     | 0.303      | 0.225     | 0.022     | 0.033     |

|   |          |            |       |       |       |       |       |       |       |       |       |       |       |       |
|---|----------|------------|-------|-------|-------|-------|-------|-------|-------|-------|-------|-------|-------|-------|
| 6 | 28534965 | rs2021745  | 0.007 | 0.007 | 0.007 | 0.007 | 0.007 | 0.002 | 0.000 | 0.000 | 0.000 | 0.001 | 0.009 | 0.000 |
| 6 | 28619143 | rs454182   | 0.014 | 0.014 | 0.014 | 0.014 | 0.014 | 0.013 | 0.021 | 0.016 | 0.002 | 0.011 | 0.035 | 0.016 |
| 6 | 28724306 | rs732395   | 0.013 | 0.013 | 0.013 | 0.013 | 0.013 | 0.018 | 0.013 | 0.003 | 0.006 | 0.000 | 0.000 | 0.001 |
| 6 | 29102968 | rs2269554  | 0.050 | 0.050 | 0.050 | 0.050 | 0.050 | 0.065 | 0.069 | 0.037 | 0.055 | 0.039 | 0.033 | 0.029 |
| 6 | 29103698 | rs10484544 | 0.050 | 0.050 | 0.050 | 0.050 | 0.050 | 0.065 | 0.069 | 0.037 | 0.055 | 0.039 | 0.033 | 0.029 |
| 6 | 29107805 | rs16894557 | 0.015 | 0.015 | 0.015 | 0.015 | 0.015 | 0.039 | 0.021 | 0.032 | 0.033 | 0.032 | 0.006 | 0.004 |
| 6 | 29131193 | rs2394514  | 0.005 | 0.005 | 0.005 | 0.005 | 0.005 | 0.001 | 0.013 | 0.024 | 0.004 | 0.026 | 0.012 | 0.001 |
| 6 | 29257421 | rs3116816  | 0.050 | 0.050 | 0.050 | 0.050 | 0.050 | 0.065 | 0.069 | 0.037 | 0.055 | 0.039 | 0.033 | 0.029 |
| 6 | 29541921 | rs2107192  | 0.051 | 0.051 | 0.051 | 0.051 | 0.051 | 0.052 | 0.040 | 0.052 | 0.026 | 0.058 | 0.031 | 0.023 |
| 6 | 29689020 | rs29225    | 0.037 | 0.037 | 0.037 | 0.037 | 0.037 | 0.061 | 0.006 | 0.015 | 0.052 | 0.017 | 0.063 | 0.059 |
| 6 | 29718968 | rs29273    | 0.029 | 0.029 | 0.029 | 0.029 | 0.029 | 0.017 | 0.027 | 0.000 | 0.022 | 0.000 | 0.061 | 0.055 |
| 6 | 29772110 | rs3129090  | 0.056 | 0.056 | 0.056 | 0.056 | 0.056 | 0.045 | 0.069 | 0.002 | 0.041 | 0.003 | 0.051 | 0.048 |
| 6 | 29782176 | rs3116788  | 0.012 | 0.012 | 0.012 | 0.012 | 0.012 | 0.009 | 0.010 | 0.001 | 0.002 | 0.004 | 0.002 | 0.006 |
| 6 | 29783770 | rs9258126  | 0.092 | 0.092 | 0.092 | 0.092 | 0.092 | 0.076 | 0.078 | 0.004 | 0.064 | 0.006 | 0.077 | 0.072 |
| 6 | 29784516 | rs6457009  | 0.086 | 0.086 | 0.086 | 0.086 | 0.086 | 0.121 | 0.059 | 0.023 | 0.161 | 0.020 | 0.148 | 0.206 |
| 6 | 29784802 | rs7762253  | 0.106 | 0.106 | 0.106 | 0.106 | 0.106 | 0.141 | 0.078 | 0.038 | 0.181 | 0.034 | 0.170 | 0.229 |
| 6 | 29785228 | rs3871467  | 0.085 | 0.085 | 0.085 | 0.085 | 0.085 | 0.121 | 0.057 | 0.022 | 0.160 | 0.020 | 0.148 | 0.205 |
| 6 | 29788471 | rs1611381  | 0.012 | 0.012 | 0.012 | 0.012 | 0.012 | 0.009 | 0.010 | 0.001 | 0.002 | 0.004 | 0.002 | 0.006 |
| 6 | 29788768 | rs1611388  | 0.012 | 0.012 | 0.012 | 0.012 | 0.012 | 0.009 | 0.010 | 0.001 | 0.002 | 0.004 | 0.002 | 0.006 |
| 6 | 29800708 | rs2072898  | 0.007 | 0.007 | 0.007 | 0.007 | 0.007 | 0.004 | 0.012 | 0.020 | 0.025 | 0.020 | 0.001 | 0.001 |
| 6 | 29804224 | rs2272874  | 0.011 | 0.011 | 0.011 | 0.011 | 0.011 | 0.007 | 0.018 | 0.026 | 0.025 | 0.027 | 0.004 | 0.003 |
| 6 | 29806029 | rs2743925  | 0.124 | 0.124 | 0.124 | 0.124 | 0.124 | 0.102 | 0.118 | 0.029 | 0.086 | 0.032 | 0.104 | 0.098 |
| 6 | 29811802 | rs9258205  | 0.011 | 0.011 | 0.011 | 0.011 | 0.011 | 0.007 | 0.018 | 0.026 | 0.025 | 0.027 | 0.004 | 0.003 |
| 6 | 29812379 | rs1736913  | 0.002 | 0.002 | 0.002 | 0.002 | 0.002 | 0.003 | 0.004 | 0.018 | 0.010 | 0.010 | 0.002 | 0.000 |
| 6 | 29815286 | rs9258215  | 0.011 | 0.011 | 0.011 | 0.011 | 0.011 | 0.007 | 0.018 | 0.026 | 0.025 | 0.027 | 0.004 | 0.003 |
| 6 | 29819726 | rs2523386  | 0.110 | 0.110 | 0.110 | 0.110 | 0.110 | 0.091 | 0.063 | 0.003 | 0.077 | 0.005 | 0.092 | 0.087 |
| 6 | 29820738 | rs2844845  | 0.105 | 0.105 | 0.105 | 0.105 | 0.105 | 0.086 | 0.052 | 0.000 | 0.074 | 0.000 | 0.083 | 0.078 |
| 6 | 29837265 | rs1610630  | 0.014 | 0.014 | 0.014 | 0.014 | 0.014 | 0.008 | 0.004 | 0.000 | 0.007 | 0.004 | 0.008 | 0.012 |
| 6 | 29841721 | rs1737055  | 0.001 | 0.001 | 0.001 | 0.001 | 0.001 | 0.000 | 0.002 | 0.011 | 0.001 | 0.004 | 0.013 | 0.020 |
| 6 | 29845542 | rs1737030  | 0.010 | 0.010 | 0.010 | 0.010 | 0.010 | 0.009 | 0.000 | 0.003 | 0.017 | 0.000 | 0.020 | 0.031 |

|   |          |            |       |       |       |       |       |       |       |       |       |       |       |       |
|---|----------|------------|-------|-------|-------|-------|-------|-------|-------|-------|-------|-------|-------|-------|
| 6 | 29873026 | rs1633002  | 0.025 | 0.025 | 0.025 | 0.025 | 0.025 | 0.061 | 0.045 | 0.043 | 0.080 | 0.025 | 0.024 | 0.043 |
| 6 | 29885150 | rs1632973  | 0.025 | 0.025 | 0.025 | 0.025 | 0.025 | 0.061 | 0.045 | 0.043 | 0.080 | 0.025 | 0.024 | 0.043 |
| 6 | 29885962 | rs1736963  | 0.025 | 0.025 | 0.025 | 0.025 | 0.025 | 0.061 | 0.045 | 0.043 | 0.080 | 0.025 | 0.024 | 0.043 |
| 6 | 29886192 | rs9258466  | 0.025 | 0.025 | 0.025 | 0.025 | 0.025 | 0.061 | 0.045 | 0.043 | 0.080 | 0.025 | 0.024 | 0.043 |
| 6 | 29888311 | rs3926748  | 0.008 | 0.008 | 0.008 | 0.008 | 0.008 | 0.014 | 0.002 | 0.000 | 0.033 | 0.000 | 0.040 | 0.049 |
| 6 | 29888508 | rs753544   | 0.025 | 0.025 | 0.025 | 0.025 | 0.025 | 0.061 | 0.045 | 0.043 | 0.080 | 0.025 | 0.024 | 0.043 |
| 6 | 29891198 | rs1318083  | 0.019 | 0.019 | 0.019 | 0.019 | 0.019 | 0.052 | 0.037 | 0.035 | 0.071 | 0.019 | 0.023 | 0.042 |
| 6 | 29907725 | rs2517898  | 0.000 | 0.000 | 0.000 | 0.000 | 0.000 | 0.000 | 0.001 | 0.012 | 0.000 | 0.016 | 0.000 | 0.002 |
| 6 | 29914041 | rs2254071  | 0.001 | 0.001 | 0.001 | 0.001 | 0.001 | 0.001 | 0.003 | 0.015 | 0.000 | 0.019 | 0.000 | 0.001 |
| 6 | 29920484 | rs2734990  | 0.008 | 0.008 | 0.008 | 0.008 | 0.008 | 0.010 | 0.011 | 0.030 | 0.008 | 0.034 | 0.001 | 0.000 |
| 6 | 29920786 | rs2523767  | 0.017 | 0.017 | 0.017 | 0.017 | 0.017 | 0.018 | 0.023 | 0.030 | 0.015 | 0.036 | 0.001 | 0.001 |
| 6 | 29925085 | rs2523765  | 0.073 | 0.073 | 0.073 | 0.073 | 0.073 | 0.093 | 0.062 | 0.053 | 0.133 | 0.053 | 0.040 | 0.064 |
| 6 | 29943813 | rs3094159  | 0.004 | 0.004 | 0.004 | 0.004 | 0.004 | 0.004 | 0.025 | 0.060 | 0.001 | 0.041 | 0.000 | 0.002 |
| 6 | 29944218 | rs3094157  | 0.002 | 0.002 | 0.002 | 0.002 | 0.002 | 0.001 | 0.000 | 0.001 | 0.007 | 0.001 | 0.001 | 0.002 |
| 6 | 29944556 | rs3132718  | 0.000 | 0.000 | 0.000 | 0.000 | 0.000 | 0.000 | 0.008 | 0.028 | 0.001 | 0.018 | 0.002 | 0.006 |
| 6 | 30024834 | rs1655902  | 0.002 | 0.002 | 0.002 | 0.002 | 0.002 | 0.001 | 0.000 | 0.001 | 0.007 | 0.001 | 0.001 | 0.002 |
| 6 | 30048351 | rs2256902  | 0.000 | 0.000 | 0.000 | 0.000 | 0.000 | 0.002 | 0.019 | 0.066 | 0.000 | 0.053 | 0.000 | 0.000 |
| 6 | 30074154 | rs9261035  | 0.048 | 0.048 | 0.048 | 0.048 | 0.048 | 0.039 | 0.025 | 0.008 | 0.033 | 0.009 | 0.040 | 0.037 |
| 6 | 30100265 | rs6925061  | 0.044 | 0.044 | 0.044 | 0.044 | 0.044 | 0.036 | 0.018 | 0.004 | 0.031 | 0.005 | 0.035 | 0.032 |
| 6 | 30134329 | rs9261265  | 0.046 | 0.046 | 0.046 | 0.046 | 0.046 | 0.038 | 0.023 | 0.009 | 0.032 | 0.010 | 0.038 | 0.036 |
| 6 | 30156284 | rs9261317  | 0.046 | 0.046 | 0.046 | 0.046 | 0.046 | 0.038 | 0.023 | 0.009 | 0.032 | 0.010 | 0.038 | 0.036 |
| 6 | 30170037 | rs6923832  | 0.046 | 0.046 | 0.046 | 0.046 | 0.046 | 0.038 | 0.023 | 0.009 | 0.032 | 0.010 | 0.038 | 0.036 |
| 6 | 30409579 | rs12663184 | 0.066 | 0.066 | 0.066 | 0.066 | 0.066 | 0.050 | 0.055 | 0.046 | 0.036 | 0.048 | 0.006 | 0.010 |
| 6 | 30491421 | rs4713325  | 0.051 | 0.051 | 0.051 | 0.051 | 0.051 | 0.050 | 0.022 | 0.006 | 0.019 | 0.003 | 0.022 | 0.004 |
| 6 | 30491855 | rs4713328  | 0.051 | 0.051 | 0.051 | 0.051 | 0.051 | 0.050 | 0.022 | 0.006 | 0.019 | 0.003 | 0.022 | 0.004 |
| 6 | 30562055 | rs2157605  | 0.051 | 0.051 | 0.051 | 0.051 | 0.051 | 0.050 | 0.022 | 0.006 | 0.019 | 0.003 | 0.022 | 0.004 |
| 6 | 30852508 | rs11757629 | 0.010 | 0.010 | 0.010 | 0.010 | 0.010 | 0.008 | 0.013 | 0.017 | 0.007 | 0.016 | 0.009 | 0.008 |
| 6 | 30899388 | rs4947289  | 0.037 | 0.037 | 0.037 | 0.037 | 0.037 | 0.061 | 0.024 | 0.015 | 0.052 | 0.017 | 0.063 | 0.059 |
| 6 | 31048548 | rs2530709  | 0.004 | 0.004 | 0.004 | 0.004 | 0.004 | 0.005 | 0.000 | 0.000 | 0.000 | 0.000 | 0.005 | 0.002 |
| 6 | 31088582 | rs12528087 | 0.010 | 0.010 | 0.010 | 0.010 | 0.010 | 0.006 | 0.017 | 0.004 | 0.027 | 0.005 | 0.003 | 0.002 |

|   |          |            |       |       |       |       |       |       |       |       |       |       |       |       |
|---|----------|------------|-------|-------|-------|-------|-------|-------|-------|-------|-------|-------|-------|-------|
| 6 | 31101937 | rs2523897  | 0.001 | 0.001 | 0.001 | 0.001 | 0.001 | 0.000 | 0.002 | 0.011 | 0.006 | 0.004 | 0.008 | 0.002 |
| 6 | 31106721 | rs6457300  | 0.048 | 0.048 | 0.048 | 0.048 | 0.048 | 0.052 | 0.055 | 0.041 | 0.029 | 0.045 | 0.036 | 0.028 |
| 6 | 31195333 | rs3130991  | 0.125 | 0.125 | 0.125 | 0.125 | 0.125 | 0.137 | 0.131 | 0.047 | 0.118 | 0.051 | 0.008 | 0.037 |
| 6 | 31203780 | rs9263715  | 0.114 | 0.114 | 0.114 | 0.114 | 0.114 | 0.095 | 0.072 | 0.069 | 0.080 | 0.071 | 0.006 | 0.043 |
| 6 | 31203795 | rs9263716  | 0.114 | 0.114 | 0.114 | 0.114 | 0.114 | 0.095 | 0.072 | 0.069 | 0.080 | 0.071 | 0.006 | 0.043 |
| 6 | 31269189 | rs3095238  | 0.023 | 0.023 | 0.023 | 0.023 | 0.023 | 0.042 | 0.016 | 0.004 | 0.020 | 0.001 | 0.008 | 0.014 |
| 6 | 31284581 | rs4516988  | 0.063 | 0.063 | 0.063 | 0.063 | 0.063 | 0.071 | 0.022 | 0.026 | 0.081 | 0.015 | 0.057 | 0.049 |
| 6 | 31292404 | rs9501522  | 0.042 | 0.042 | 0.042 | 0.042 | 0.042 | 0.034 | 0.024 | 0.034 | 0.029 | 0.034 | 0.007 | 0.005 |
| 6 | 31314899 | rs2394894  | 0.086 | 0.086 | 0.086 | 0.086 | 0.086 | 0.065 | 0.063 | 0.069 | 0.110 | 0.072 | 0.187 | 0.147 |
| 6 | 31314958 | rs2394895  | 0.080 | 0.080 | 0.080 | 0.080 | 0.080 | 0.059 | 0.056 | 0.061 | 0.105 | 0.064 | 0.180 | 0.141 |
| 6 | 31318845 | rs3134762  | 0.086 | 0.086 | 0.086 | 0.086 | 0.086 | 0.065 | 0.063 | 0.069 | 0.110 | 0.072 | 0.187 | 0.147 |
| 6 | 31373241 | rs2246954  | 0.041 | 0.041 | 0.041 | 0.041 | 0.041 | 0.051 | 0.030 | 0.005 | 0.056 | 0.003 | 0.099 | 0.085 |
| 6 | 31373293 | rs2524123  | 0.109 | 0.109 | 0.109 | 0.109 | 0.109 | 0.110 | 0.067 | 0.022 | 0.115 | 0.015 | 0.034 | 0.045 |
| 6 | 31374096 | rs2524095  | 0.077 | 0.077 | 0.077 | 0.077 | 0.077 | 0.085 | 0.068 | 0.029 | 0.088 | 0.025 | 0.106 | 0.090 |
| 6 | 31374340 | rs16899205 | 0.017 | 0.017 | 0.017 | 0.017 | 0.017 | 0.008 | 0.021 | 0.012 | 0.007 | 0.015 | 0.048 | 0.042 |
| 6 | 31374501 | rs2524089  | 0.086 | 0.086 | 0.086 | 0.086 | 0.086 | 0.094 | 0.077 | 0.035 | 0.096 | 0.031 | 0.116 | 0.099 |
| 6 | 31377133 | rs2524066  | 0.077 | 0.077 | 0.077 | 0.077 | 0.077 | 0.085 | 0.068 | 0.029 | 0.088 | 0.025 | 0.106 | 0.090 |
| 6 | 31377152 | rs9366778  | 0.053 | 0.053 | 0.053 | 0.053 | 0.053 | 0.033 | 0.066 | 0.058 | 0.028 | 0.064 | 0.059 | 0.050 |
| 6 | 31444583 | rs2844569  | 0.136 | 0.136 | 0.136 | 0.136 | 0.136 | 0.092 | 0.121 | 0.080 | 0.129 | 0.104 | 0.109 | 0.108 |
| 6 | 31452636 | rs2844546  | 0.145 | 0.145 | 0.145 | 0.145 | 0.145 | 0.106 | 0.125 | 0.081 | 0.152 | 0.104 | 0.092 | 0.091 |
| 6 | 31453575 | rs2507984  | 0.125 | 0.125 | 0.125 | 0.125 | 0.125 | 0.086 | 0.107 | 0.067 | 0.125 | 0.091 | 0.109 | 0.108 |
| 6 | 31460019 | rs2442749  | 0.158 | 0.158 | 0.158 | 0.158 | 0.158 | 0.131 | 0.124 | 0.097 | 0.207 | 0.099 | 0.187 | 0.180 |
| 6 | 31632830 | rs2857605  | 0.001 | 0.001 | 0.001 | 0.001 | 0.001 | 0.008 | 0.009 | 0.000 | 0.001 | 0.000 | 0.011 | 0.006 |
| 6 | 31636669 | rs13215091 | 0.000 | 0.000 | 0.000 | 0.000 | 0.000 | 0.000 | 0.002 | 0.004 | 0.001 | 0.005 | 0.018 | 0.017 |
| 6 | 31683255 | rs9348876  | 0.019 | 0.019 | 0.019 | 0.019 | 0.019 | 0.013 | 0.008 | 0.015 | 0.007 | 0.016 | 0.009 | 0.007 |
| 6 | 31692979 | rs2857597  | 0.006 | 0.006 | 0.006 | 0.006 | 0.006 | 0.014 | 0.004 | 0.011 | 0.021 | 0.007 | 0.025 | 0.017 |
| 6 | 31710946 | rs1046089  | 0.023 | 0.023 | 0.023 | 0.023 | 0.023 | 0.029 | 0.022 | 0.022 | 0.064 | 0.024 | 0.119 | 0.086 |
| 6 | 31726100 | rs805301   | 0.017 | 0.017 | 0.017 | 0.017 | 0.017 | 0.023 | 0.016 | 0.029 | 0.054 | 0.031 | 0.103 | 0.073 |
| 6 | 31733486 | rs707922   | 0.019 | 0.019 | 0.019 | 0.019 | 0.019 | 0.016 | 0.024 | 0.000 | 0.013 | 0.000 | 0.016 | 0.015 |
| 6 | 31765733 | rs707917   | 0.014 | 0.014 | 0.014 | 0.014 | 0.014 | 0.016 | 0.008 | 0.000 | 0.013 | 0.000 | 0.039 | 0.056 |

|   |          |            |       |       |       |       |       |       |       |       |       |       |       |       |
|---|----------|------------|-------|-------|-------|-------|-------|-------|-------|-------|-------|-------|-------|-------|
| 6 | 31796497 | rs805293   | 0.011 | 0.011 | 0.011 | 0.011 | 0.011 | 0.007 | 0.028 | 0.017 | 0.018 | 0.025 | 0.044 | 0.032 |
| 6 | 31796778 | rs4713479  | 0.021 | 0.021 | 0.021 | 0.021 | 0.021 | 0.018 | 0.027 | 0.004 | 0.015 | 0.005 | 0.018 | 0.017 |
| 6 | 31850569 | rs707928   | 0.003 | 0.003 | 0.003 | 0.003 | 0.003 | 0.005 | 0.004 | 0.017 | 0.023 | 0.021 | 0.109 | 0.102 |
| 6 | 32152812 | rs9267798  | 0.027 | 0.027 | 0.027 | 0.027 | 0.027 | 0.038 | 0.015 | 0.030 | 0.024 | 0.023 | 0.005 | 0.004 |
| 6 | 32269302 | rs12663103 | 0.006 | 0.006 | 0.006 | 0.006 | 0.006 | 0.003 | 0.000 | 0.004 | 0.001 | 0.003 | 0.001 | 0.000 |
| 6 | 32290737 | rs206015   | 0.019 | 0.019 | 0.019 | 0.019 | 0.019 | 0.013 | 0.030 | 0.015 | 0.007 | 0.016 | 0.009 | 0.007 |
| 6 | 32467438 | rs16870123 | 0.027 | 0.027 | 0.027 | 0.027 | 0.027 | 0.005 | 0.030 | 0.060 | 0.004 | 0.076 | 0.078 | 0.073 |
| 6 | 32467799 | rs17577980 | 0.027 | 0.027 | 0.027 | 0.027 | 0.027 | 0.022 | 0.035 | 0.044 | 0.019 | 0.043 | 0.000 | 0.000 |
| 6 | 32520413 | rs3177928  | 0.011 | 0.011 | 0.011 | 0.011 | 0.011 | 0.000 | 0.027 | 0.027 | 0.000 | 0.038 | 0.055 | 0.049 |
| 6 | 32537697 | rs9268856  | 0.101 | 0.101 | 0.101 | 0.101 | 0.101 | 0.139 | 0.060 | 0.059 | 0.180 | 0.044 | 0.308 | 0.362 |
| 6 | 32539270 | rs9268878  | 0.101 | 0.101 | 0.101 | 0.101 | 0.101 | 0.139 | 0.060 | 0.059 | 0.180 | 0.044 | 0.308 | 0.362 |
| 6 | 32665279 | rs17210980 | 0.005 | 0.005 | 0.005 | 0.005 | 0.005 | 0.004 | 0.007 | 0.008 | 0.004 | 0.008 | 0.004 | 0.004 |
| 6 | 32766288 | rs9469220  | 0.014 | 0.014 | 0.014 | 0.014 | 0.014 | 0.020 | 0.008 | 0.004 | 0.020 | 0.002 | 0.074 | 0.060 |
| 6 | 32798005 | rs9275793  | 0.000 | 0.000 | 0.000 | 0.000 | 0.000 | 0.001 | 0.000 | 0.001 | 0.022 | 0.001 | 0.010 | 0.014 |
| 6 | 32808662 | rs9276227  | 0.001 | 0.001 | 0.001 | 0.001 | 0.001 | 0.005 | 0.007 | 0.018 | 0.000 | 0.020 | 0.051 | 0.047 |
| 6 | 32811086 | rs9276299  | 0.004 | 0.004 | 0.004 | 0.004 | 0.004 | 0.001 | 0.011 | 0.021 | 0.000 | 0.022 | 0.023 | 0.020 |
| 6 | 32847945 | rs1383264  | 0.041 | 0.041 | 0.041 | 0.041 | 0.041 | 0.044 | 0.021 | 0.019 | 0.019 | 0.017 | 0.074 | 0.080 |
| 6 | 33132584 | rs376877   | 0.000 | 0.000 | 0.000 | 0.000 | 0.000 | 0.002 | 0.001 | 0.001 | 0.002 | 0.002 | 0.011 | 0.008 |
| 6 | 33202847 | rs3129274  | 0.028 | 0.028 | 0.028 | 0.028 | 0.028 | 0.037 | 0.013 | 0.011 | 0.050 | 0.013 | 0.193 | 0.192 |

## **Supplementary Sample Information**

All individuals provided written, informed consent for participation and approval was obtained from the ethics committees at each location.

### **1. BIOX samples**

All schizophrenia patients analyzed in this study were interviewed by 2 independent psychiatrists, diagnosed according to DSM-IV criteria and had a 2-year history of schizophrenia. All healthy controls were randomly selected from Chinese Han volunteers who were requested to reply to a written invitation to evaluate their medical history. Practice lists of controls were screened for potentially suitable volunteers by excluding subjects with major mental illness.

In the BIOX GWAS, the Northern Han sample set of 1,578 cases and 1,592 controls were recruited from Beijing and Shandong Province; the Central Han sample set of 1,238 cases and 2,856 controls were recruited from Shanghai and Anhui Province; and the Southern Han sample set of 934 cases and 2,020 controls were recruited from Guangdong and Guangxi Provinces.

In the replication stage, 4,383 schizophrenia cases and 4,539 healthy controls recruited from Shanghai were analyzed. All subjects in the replication stage were unrelated and born in Shanghai and their parents had to be local residents

of Shanghai as well.

Details also can be found in Online Methods and supplementary table 1.

## **2. SGENE-plus samples**

***Denmark/Copenhagen.*** The Danish sample included 513 patients and 471 controls. Patients were recruited to the Danish Psychiatric Biobank from the psychiatric departments of the six hospitals in the Copenhagen region and were clinically diagnosed with schizophrenia according to ICD-10 (F20) without ever having received a diagnosis of mania or bipolar illness (F30 or F31). An experienced research-and-consultant psychiatrist verified the high reliability of the clinical diagnoses using the Operational Criteria Checklist for Psychotic and Affective Illness (OPCRIT)<sup>1</sup>. The controls were recruited through the Danish Blood Donor Corps in the Copenhagen area; apparent behavioral abnormality was an exclusion criterion.

***England.*** The English sample included 93 schizophrenia patients drawn from the Maudsley Family Study of psychosis<sup>2</sup>, the psychosis twin study<sup>3</sup>, and the genetics and psychosis (GAP) study<sup>4</sup> and 88 unrelated controls with no history of major mental illness. Patients were interviewed with the Schedule for Affective Disorders and Schizophrenia Lifetime Version (SADS-L)<sup>5</sup> or the Item Group Checklist (IGC) of the Schedule for Clinical Assessment in

Neuropsychiatry (SCAN)<sup>6</sup> and diagnosed according to International Classification of Disease, 10th revision, Diagnostic Criteria for Research (ICD-10-DCR).

***Finland.*** The Finnish sample was made up of 182 schizophrenia patients drawn from a nationwide collection of families with schizophrenia spectrum disorders and 197 controls. Patients were diagnosed by two independent psychiatrists, blind to family structures, who made a consensus diagnosis to give best-estimate lifetime diagnoses according to Diagnostic and Statistical Manual of Mental Disorders, Fourth Edition (DSM-IV) criteria. Controls were derived from the Health 2000 survey<sup>7,8</sup>. Of the patients finally included, 123 were from Kuusamo, an internal isolate of Finland having a 3.0% age corrected lifetime risk for schizophrenia compared to 1.1% in the general population<sup>9</sup>, and 59 came from outside of Kuusamo. Of the controls finally included, 50 were from Kuusamo and 147 were from outside of Kuusamo.

***Germany/Bonn.*** The Bonn sample was comprised of 483 patients and 367 controls. Patients were recruited from consecutive hospital admissions. At least two experienced psychiatrists/psychologists made lifetime, best-estimate diagnoses according to DSM-IV criteria using multiple sources of information including structured interviews with the SCID<sup>10</sup> or the SADS-L<sup>5</sup>, OPCRIT<sup>1</sup> data, medical records, and family history. Controls were derived from the Heinz

Nixdorf Recall study.

**Germany (Munich).** The German genome-wide typed sample consisted of 565 cases and 604 controls. Cases diagnosed with DSM-IV schizophrenia were ascertained from the Munich area. Detailed medical and psychiatric histories were collected, including a clinical interview using the Structured Clinical Interview for Axis I DSM-IV Disorders (SCID)<sup>10</sup>. Exclusion criteria included a history of head injury or neurological diseases. The controls were unrelated volunteers randomly selected from the general population of Munich. To exclude subjects with central neurological diseases and psychotic disorders or subjects who had first-degree relatives with psychotic disorders, several screenings were conducted before the volunteers were enrolled in the study.

**Iceland.** The Icelandic sample consisted of 531 cases and 11,615 controls after quality control. Patients and controls were recruited from all over Iceland. Diagnoses were assigned according to Research Diagnostic Criteria (RDC)<sup>11</sup> through the use of the SADS-L<sup>5</sup>. The controls were recruited as a part of various genetic programs at deCODE.

**Italy.** The Italian sample consisted of 84 patients and 89 controls remained following QC. Patients were interviewed using the IGC<sup>6</sup> and diagnosed with schizophrenia according to ICD-10-DCR. Controls were unrelated volunteers randomly selected from the general population of South Verona.

***The Netherlands.*** The Dutch sample consisted of 693 patients and 629 controls. In-patients and out-patients were recruited from different psychiatric hospitals and institutions throughout the Netherlands, coordinated via academic hospitals in Amsterdam, Groningen, Maastricht and Utrecht. Detailed medical and psychiatric histories were collected, including the Comprehensive Assessment of Symptoms and History (CASH), an instrument for assessing diagnosis and psychopathology<sup>12</sup>. Only patients with a DSM-IV diagnosis of schizophrenia were included as cases. Controls were volunteers that were free of any history of psychiatric disorders.

***Scotland.*** The Scottish sample was comprised of 658 schizophrenia cases and 661 controls. All participants self-identified as born in the British Isles (95% in Scotland). Cases met DSM-IV and ICD-10 criteria for schizophrenia with diagnosis made by OPCRIT<sup>1</sup>. Controls were volunteers recruited through general practices in Scotland. Practice lists were screened for potentially suitable volunteers by age and sex, and subjects with major mental illness or use of antipsychotic medication were excluded.

## References

1. McGuffin, P., Farmer, A. & Harvey, I. A polydiagnostic application of operational criteria in studies of psychotic illness. Development and reliability of the OPCRIT system. *Arch Gen Psychiatry* **48**, 764-70 (1991).
2. Rosa, A. et al. Further evidence that congenital dermatoglyphic abnormalities are associated with psychosis: a twin study. *Schizophr Bull* **28**, 697-701 (2002).
3. Touloupoulou, T., Rabe-Hesketh, S., King, H., Murray, R.M. & Morris, R.G. Episodic memory in schizophrenic patients and their relatives. *Schizophr Res* **63**, 261-71 (2003).
4. Boydell, J. et al. A comparison of symptoms and family history in schizophrenia with and without prior cannabis use: implications for the concept of cannabis psychosis. *Schizophr Res* **93**, 203-10 (2007).
5. Endicott, J. & Spitzer, R.L. A diagnostic interview: the schedule for affective disorders and schizophrenia. *Arch Gen Psychiatry* **35**, 837-44 (1978).
6. Wing, J.K. et al. SCAN. Schedules for Clinical Assessment in Neuropsychiatry. *Arch Gen Psychiatry* **47**, 589-93 (1990).
7. Aromaa, A. & Koskinen, S. Health and functional capacity in Finland. Baseline Results of the Health 2000 Health Examination Survey.

(Publications of the National Public Health Institute Helsinki., 2004).

8. Pirkola, S.P. et al. DSM-IV mood-, anxiety- and alcohol use disorders and their comorbidity in the Finnish general population--results from the Health 2000 Study. *Soc Psychiatry Psychiatr Epidemiol* **40**, 1-10 (2005).
9. Hovatta, I. et al. Schizophrenia in the genetic isolate of Finland. *Am J Med Genet* **74**, 353-60 (1997).
10. First M, S.R., Gibbon M, Williams J. *Structured Clinical Interview for Axis I DSM-IV Disorders*, (Biometrics Research, New York, 1994).
11. Spitzer, R.L., Endicott, J., & Robins, E. Research diagnostic criteria: rationale and reliability. *Arch Gen Psychiatry* **35**, 773-782 (1978).
12. Andreasen, N.C., Flaum, M. & Arndt, S. The Comprehensive Assessment of Symptoms and History (CASH). An instrument for assessing diagnosis and psychopathology. *Arch Gen Psychiatry* **49**, 615-23 (1992).
